# Supplementary material
Source: Research Square preprint supplement (doi:10.21203/rs.3.rs-9861203/v1)
Supplement: Supplementary file 1 [file 135ae76159e3c6bc0ea0e4e3.docx]

**MASTER DOSSIER**

*Event archive: 213 post-publication accuracy events across ten internationally disseminated medical educational resources*

**Mohammed Waleed Abdullah**

*Medical Student*

Independent Researcher

*Sole-authored independent audit — no institutional support, no external funding, no co-investigators*

**Supplementary Material 1 — companion to the BMC Medical Education manuscript**

# Summary of events across all source resources

| **#** | **Reference Work** | **Events (n)** | **Editorial Status** |
| --- | --- | --- | --- |
| **1** | Bailey & Love's Short Practice of Surgery (28th ed.) | **38** | 13 ✓ Accepted · 25 Forwarded |
| **2** | Plastic Surgery — Hand Spaces (Elsevier / Karen) | **8** | ✓ Implemented |
| **3** | Macleod's Clinical Examination (15th ed.) | **3** | ✓ Accepted |
| **4** | Davidson's Principles and Practice of Medicine (24th ed.) | **65** | Mostly ✓ Accepted |
| **5** | Nelson Textbook of Pediatrics | **43** | ✓ Acknowledged for revision |
| **6** | Principles of Neurological Surgery (4th ed.) | **11** | Forwarded for editorial revision |
| **7** | Dermatology Essentials (2nd ed.) | **11** | Discussion ongoing |
| **8** | Basic and Clinical Pharmacology (Katzung, 2013) | **7** | ✓ Accepted for new edition |
| **9** | Apley & Solomon's System of Orthopaedics and Trauma | **19** | Forwarded to next editor |
| **10** | Orthobullets — Sciatic Nerve | **8** | Forwarded for review |
| **TOTAL INDEPENDENT SUB-CONTRIBUTIONS** | | **213** | *across 10 reference works* |

# Book 1 — Bailey & Love's Short Practice of Surgery (28th Edition)

**Total: 38 independent sub-contributions**

| **No.** | **Issue Identified in Text** | **Correction & Supporting References** | **Editorial Response** |
| --- | --- | --- | --- |
| **1** | **Topic:** Hypercalcaemic Crisis, p. 876 — clinical presentation, blood-pressure changes  Early-crisis hypertension not described. | Add: Hypertension is frequently observed in early hypercalcaemic crisis due to increased vascular tone, with significant perioperative implications.  **Refs:** Harrison's Principles of Internal Medicine, 21st ed.; Williams Textbook of Endocrinology, 14th ed.; Oxford Handbook of Endocrinology and Diabetes, 4th ed. | ✓ Confirmed by Editor (Prof. P. R. O'Connell) for incorporation into the 29th edition. |
| **2** | Transition to hypotension and circulatory collapse not described. | Add: As crisis progresses, hypotension may develop, indicating circulatory collapse and multi-organ dysfunction.  **Refs:** Williams Textbook of Endocrinology, 14th ed.; Harrison's 21st ed. | ✓ Confirmed for incorporation into the 29th edition. |
| **3** | Clinical-pearl on HTN→hypotension transition for perioperative fluid management not stated. | Add: Recognising the transition from hypertension to hypotension is crucial for optimising fluid management strategies in surgical patients.  **Refs:** Oxford Handbook of Endocrinology and Diabetes, 4th ed. | ✓ Confirmed for incorporation into the 29th edition. |
| **4** | Acute Kidney Injury as a complication not mentioned. | Add: AKI from calcium deposition in the kidneys.  **Refs:** Harrison's 21st ed.; KDIGO AKI Guidelines 2012. | ✓ Confirmed for incorporation into the 29th edition. |
| **5** | Preoperative fluid resuscitation requirement not stated. | Add: AKI may necessitate preoperative fluid resuscitation.  **Refs:** Harrison's 21st ed.; KDIGO AKI Guidelines. | ✓ Confirmed for incorporation into the 29th edition. |
| **6** | Dialysis requirement in severe cases not stated. | Add: AKI may necessitate dialysis in severe hypercalcaemic crisis.  **Refs:** KDIGO AKI Guidelines 2012. | ✓ Confirmed for incorporation into the 29th edition. |
| **7** | Polyuria and polydipsia as risk-amplifiers not stated. | Add: Polyuria and polydipsia lead to dehydration, exacerbating perioperative metabolic instability.  **Refs:** Williams Textbook of Endocrinology, 14th ed. | ✓ Confirmed for incorporation into the 29th edition. |
| **8** | Nephrocalcinosis as a complication not mentioned. | Add: Nephrocalcinosis may require urological intervention in chronic cases.  **Refs:** Harrison's 21st ed.; Campbell-Walsh Urology, 12th ed. | ✓ Confirmed for incorporation into the 29th edition. |
| **9** | Nephrolithiasis as a complication not mentioned. | Add: Nephrolithiasis may require urological intervention.  **Refs:** Williams Textbook of Endocrinology, 14th ed.; Campbell-Walsh Urology, 12th ed. | ✓ Confirmed for incorporation into the 29th edition. |
| **10** | **Topic:** PTH regulation by magnesium, Ch 51, p. 824, para 8  Printed text: "PTH is secreted in response to low serum calcium or high serum magnesium levels." — direction inverted. | Affirm correct physiology: low serum calcium stimulates PTH secretion.  **Refs:** Davidson's Principles and Practice of Medicine 22nd ed., p. 677; Greenspan's Basic & Clinical Endocrinology, 10th ed. | ✓ Editor confirmed error; correction will be applied in any future print and electronic versions. |
| **11** | Effect of mild hypomagnesaemia on PTH omitted. | Add: Mild hypomagnesaemia may stimulate PTH secretion.  **Refs:** Lacroix et al., Nephrology Dialysis Transplantation 2013; Vetter & Lohse, Curr Opin Nephrol Hypertens 2002. | ✓ Confirmed for correction in future editions. |
| **12** | Stated direction of effect for severe hypomagnesaemia is inverted from established physiology. | Correct: Severe hypomagnesaemia inhibits both PTH secretion and PTH action.  **Refs:** Rude RK, Magnesium deficiency, J Bone Miner Res 1998; Davidson's 22nd ed. | ✓ Confirmed for correction. |
| **13** | Hypermagnesaemia effect on PTH inverted in printed text. | Correct: Hypermagnesaemia (particularly when calcium is low or normal) suppresses PTH secretion.  **Refs:** Lacroix et al., Nephrology Dialysis Transplantation 2013. | ✓ Confirmed for correction. |
| **14** | **Topic:** Male urethra anatomy, Ch 85, p. 1538  Penile urethra described as extending from meatus to penoscrotal junction — direction reversed. | Correct: penile (spongy) urethra extends proximal-to-distal from the distal end of the bulbar urethra to the external urethral meatus.  **Refs:** Gray's Anatomy, 42nd ed.; Last's Anatomy: Regional and Applied, 12th ed. | → Editor forwarded to publisher and Prof. Sayers (urology editor) for review. |
| **15** | Fossa navicularis described as synonymous with the entire glandular urethra — imprecise. | Clarify: the fossa navicularis is specifically the dilated segment within the glans, not a synonym for the entire glandular urethra.  **Refs:** Gray's Anatomy, 42nd ed. | → Forwarded to urology editor. |
| **16** | External urethral sphincter described as containing both smooth and striated muscle — clear error. | Correct: the external urethral sphincter (rhabdosphincter) is composed exclusively of striated muscle; smooth muscle is restricted to the internal sphincter at the bladder neck.  **Refs:** Gray's Anatomy, 42nd ed.; Wheater's Functional Histology, 7th ed. | → Forwarded to urology editor. |
| **17** | Innervation of membranous urethra attributed solely to pudendal nerve (S2–S4). | Add: essential autonomic innervation derived from the pelvic plexus, vital for functional anatomy.  **Refs:** Gray's Anatomy, 42nd ed.; Last's Anatomy, 12th ed. | → Forwarded to urology editor. |
| **18** | Urethral epithelial transition described as transitional → stratified squamous — incomplete sequence. | Correct sequence: Transitional (prostatic) → Pseudostratified columnar (membranous and most of spongy) → Stratified squamous (distal fossa navicularis).  **Refs:** Wheater's Functional Histology, 7th ed.; Junqueira's Basic Histology, 16th ed. | → Forwarded to urology editor. |
| **19** | **Topic:** Urinary bladder, Ch 83, Table 83.3 (aetiological classification)  Transverse myelitis listed under congenital causes. | Transverse myelitis is an acquired (post-natal) condition and should not be grouped with congenital causes.  **Refs:** Campbell-Walsh Urology, 12th ed.; Adams and Victor's Principles of Neurology, 12th ed. | → Editor copied publishers and Prof. Sayers (urology editor) for review. |
| **20** | Most CNS tumours listed under congenital causes — incorrect classification. | The majority of CNS tumours are acquired pathology; the current grouping conflates developmental anomalies with post-natal disease.  **Refs:** Campbell-Walsh Urology, 12th ed.; WHO Classification of Tumours of the Central Nervous System, 5th ed. | → Forwarded to urology editor. |
| **21** | Table 83.1 — Pudendal nerve function wording implies a direct motor effect on detrusor muscle. | The pudendal nerve does not innervate detrusor smooth muscle. It provides somatic motor innervation to the external urethral sphincter and sensory fibres from the perineum.  **Refs:** Gray's Anatomy, 42nd ed.; Campbell-Walsh Urology, 12th ed. | → Forwarded to urology editor. |
| **22** | Table 83.2 — "Cardiac arrhythmia" listed as a common antimuscarinic adverse effect. | Tachycardia is the typical antimuscarinic effect; clinically significant arrhythmias are uncommon and agent/patient dependent.  **Refs:** Goodman & Gilman's The Pharmacological Basis of Therapeutics, 14th ed.; Katzung Basic & Clinical Pharmacology, 16th ed. | → Forwarded to urology editor. |
| **23** | **Page:** 1487  M2/M3 muscarinic receptor functional distinction not stated. | Although M2 receptors are numerically predominant in the bladder, M3 receptors mediate detrusor contraction — state explicitly.  **Refs:** Goodman & Gilman's 14th ed.; Andersson KE, Pharmacol Rev 2011. | → Forwarded to urology editor. |
| **24** | **Page:** 1488  β3-adrenoceptor agonist mechanism described only as afferent-signal reduction. | Multifactorial mechanism, including direct detrusor relaxation during storage phase, should be acknowledged.  **Refs:** Andersson KE, Pharmacol Rev 2011; EAU Guidelines on Non-Neurogenic Female LUTS. | → Forwarded to urology editor. |
| **25** | Table 83.4 — NLUTD management not framed as urodynamically guided. | Management should be presented as urodynamically guided.  **Refs:** EAU Guidelines on Neuro-Urology, 2023. | → Forwarded to urology editor. |
| **26** | Sacral neuromodulation indications stated too broadly. | Sacral neuromodulation applies to selected patients with incomplete lesions, NOT indicated in complete spinal cord transection.  **Refs:** EAU Guidelines on Neuro-Urology, 2023. | → Forwarded to urology editor. |
| **27** | **Page:** 1486  Applied anatomy uses "obliterated hypogastric arteries." | Anatomically incorrect; correct term is "obliterated umbilical arteries," forming the lateral umbilical ligaments.  **Refs:** Gray's Anatomy, 42nd ed.; Moore's Clinically Oriented Anatomy, 9th ed. | → Forwarded to urology editor. |
| **28** | **Topic:** Stomach venous drainage, Ch 67, p. 1148  Greater-curvature veins described as draining entirely into the splenic vein. | The right gastroepiploic vein most commonly drains into the superior mesenteric vein, frequently via the gastrocolic trunk (Henle's trunk).  **Refs:** Gray's Anatomy, 42nd ed.; Skandalakis Surgical Anatomy, 1st ed. | → Editor forwarded to publisher Mrs. Miranda Bromage (Taylor & Francis). |
| **29** | Surgical relevance of SMV-tributary recognition not stated. | Add: accurate identification of SMV tributaries is critical during gastrectomy and pancreaticoduodenectomy.  **Refs:** Skandalakis Surgical Anatomy; Sabiston Textbook of Surgery, 21st ed. | → Forwarded to publisher. |
| **30** | Right gastric artery described as arising from the common hepatic artery. | The right gastric artery most commonly originates from the proper hepatic artery, with well-recognised variations.  **Refs:** Gray's Anatomy, 42nd ed.; Skandalakis Surgical Anatomy. | → Forwarded to publisher. |
| **31** | Surgical relevance for vessel ligation / D2 lymphadenectomy not stated. | Add: precise knowledge of right gastric artery origin is critical during vessel ligation and D2 lymphadenectomy in gastric cancer surgery.  **Refs:** Japanese Gastric Cancer Treatment Guidelines (6th ed.); Sabiston 21st ed. | → Forwarded to publisher. |
| **32** | **Topic:** Acute pancreatitis, Ch 72, p. 1270 — antibiotic prophylaxis  Text suggests prophylactic antibiotics may be considered in severe acute pancreatitis. | Modern guidelines advise against routine prophylactic antibiotics in sterile necrotising pancreatitis. Antibiotics only for proven/strongly suspected infected necrosis or documented extrapancreatic infection.  **Refs:** IAP/APA Acute Pancreatitis Guidelines 2013; ACG Acute Pancreatitis Guideline 2013/2024. | → Forwarded to chapter author for 29th edition; a follow-up message was subsequently sent regarding this section — awaiting further editorial response. |
| **33** | Indications for ERCP wording out of date — severe pancreatitis alone listed as an indication. | Early ERCP is now recommended primarily for acute cholangitis or persistent biliary obstruction; severe pancreatitis alone is no longer an urgent ERCP indication.  **Refs:** ESGE Guidelines 2020; ACG Guidelines. | → Forwarded for 29th edition; follow-up message sent — awaiting further editorial response. |
| **34** | Optimal timing of contrast-enhanced CT not specified. | Once diagnosis is established, contrast-enhanced CT is best delayed to ~72–96 hours after symptom onset to accurately assess pancreatic necrosis.  **Refs:** Revised Atlanta Classification 2012; ACR Appropriateness Criteria. | → Forwarded for 29th edition; follow-up message sent — awaiting further editorial response. |
| **35** | Early fluid resuscitation strategy under-specified. | Emphasise early, goal-directed isotonic crystalloid resuscitation — preferably Ringer's lactate — within first 6–12 hours.  **Refs:** ACG Acute Pancreatitis Guideline; de-Madaria E et al., WATERFALL trial, NEJM 2022. | → Forwarded for 29th edition; follow-up message sent — awaiting further editorial response. |
| **36** | Terminology "pancreatic abscess" outdated. | Replaced in Revised Atlanta Classification by "infected acute necrotic collection" and "infected walled-off necrosis."  **Refs:** Banks PA et al., Revised Atlanta Classification, Gut 2013. | → Forwarded for 29th edition; follow-up message sent — awaiting further editorial response. |
| **37** | Role of rectal NSAIDs in post-ERCP pancreatitis prevention not mentioned. | Add established role of rectal NSAIDs (indomethacin or diclofenac) as routine prophylaxis.  **Refs:** ESGE Guidelines 2020; Elmunzer BJ et al., NEJM 2012. | → Forwarded for 29th edition; follow-up message sent — awaiting further editorial response. |
| **38** | Hypertriglyceridaemia thresholds not specified. | Risk of pancreatitis increases markedly above ~1000 mg/dL, with rising risk above 500 mg/dL.  **Refs:** Endocrine Society Clinical Practice Guideline; Berglund L et al., JCEM 2012. | → Forwarded for 29th edition; follow-up message sent — awaiting further editorial response. |

# Book 2 — Plastic Surgery Reference — Deep Palmar Spaces (Elsevier)

**Total: 8 independent sub-contributions**

| **No.** | **Issue Identified in Text** | **Correction & Supporting References** | **Editorial Response** |
| --- | --- | --- | --- |
| **1** | **Topic:** Midpalmar (Deep Palmar) Space — volar boundary  Text includes palmar aponeurosis as a boundary of the midpalmar space. | The palmar aponeurosis is superficial and is not a true boundary. The volar boundary is formed by the flexor tendon sheaths and lumbrical muscles.  **Refs:** Green's Operative Hand Surgery, 8th ed.; Netter's Concise Orthopaedic Anatomy, 2nd ed. | ✓ Author Karen: corrections inserted into the e-book and online versions; will be included in next printed edition. |
| **2** | **Topic:** Thenar Space — radial boundary  Confusion between the midvolar (oblique) septum and the true radial boundary. | The radial boundary is defined by the insertion of the thenar muscles and the fascia of the adductor pollicis.  **Refs:** Green's Operative Hand Surgery, 8th ed. | ✓ Inserted into the e-book and online versions. |
| **3** | Mislocation of the midvolar septum. | Clarify: the midvolar septum is ulnar and separates the thenar from the midpalmar space — not radial.  **Refs:** Green's Operative Hand Surgery, 8th ed. | ✓ Inserted into the e-book and online versions. |
| **4** | Thenar Space — dorsal boundary uses non-standard abbreviation "ADP." | Use the full anatomical term: adductor pollicis muscle (oblique head), forming the dorsal boundary.  **Refs:** Gray's Anatomy, 42nd ed. | ✓ Inserted into the e-book and online versions. |
| **5** | **Topic:** Hypothenar Space — volar boundary  Focus solely on the small-finger flexor tendon is incomplete. | The hypothenar fascia and superficial hypothenar muscles form the true volar boundary.  **Refs:** Green's Operative Hand Surgery, 8th ed. | ✓ Inserted into the e-book and online versions. |
| **6** | **Topic:** Interdigital (Web) Spaces — radial and ulnar boundaries  Boundaries described too simply. | Boundaries involve the extensor mechanism, MCP joint capsule, and lateral fibrous septa.  **Refs:** Standard hand surgery atlases; Green's Operative Hand Surgery, 8th ed. | ✓ Inserted into the e-book and online versions. |
| **7** | **Topic:** Parona's Space — orientation reversed  Volar and dorsal boundaries are inverted in the text. | Digital flexor tendons are superficial (volar); pronator quadratus forms the deep (dorsal) boundary.  **Refs:** Gray's Anatomy, 42nd ed.; Green's Operative Hand Surgery, 8th ed. | ✓ Inserted into the e-book and online versions; pending next print. |
| **8** | Clinical-relevance statement for spread of deep-space infections to forearm not included. | Add explicit relevance: orientation is crucial for understanding spread of deep-space infections from hand to forearm.  **Refs:** Green's Operative Hand Surgery, 8th ed. | ✓ Inserted into the e-book and online versions. |

# Book 3 — Macleod's Clinical Examination (15th Edition)

**Total: 3 independent sub-contributions**

| **No.** | **Issue Identified in Text** | **Correction & Supporting References** | **Editorial Response** |
| --- | --- | --- | --- |
| **1** | **Location:** Box 4.19, p. 64 — "Ejection systolic murmurs"  Aortic regurgitation listed under ejection systolic murmurs. | AR is fundamentally a DIASTOLIC murmur (high-pitched, early diastolic, decrescendo). Any associated systolic murmur is a non-pathognomonic functional flow murmur.  **Refs:** Lilly LS, Pathophysiology of Heart Disease, 6th ed.; Braunwald's Heart Disease, 12th ed.; Kumar & Clark's Clinical Medicine, 10th ed. | ✓ Correction accepted by editorial team. |
| **2** | Pulmonary regurgitation listed under ejection systolic murmurs. | PR (especially in pulmonary hypertension — Graham Steell murmur) is DIASTOLIC, not ejection systolic.  **Refs:** Braunwald's Heart Disease, 12th ed.; Lilly LS, Pathophysiology of Heart Disease, 6th ed. | ✓ Correction accepted. |
| **3** | No clarification that any associated systolic flow murmur with AR/PR is functional. | Add explicit statement: any associated systolic murmur in AR/PR is non-pathognomonic functional flow murmur, not characteristic of the lesion itself.  **Refs:** Kumar & Clark's Clinical Medicine, 10th ed.; Lilly LS, Pathophysiology of Heart Disease, 6th ed. | ✓ Correction accepted. |

# Book 4 — Davidson's Principles and Practice of Medicine (24th Edition)

**Total: 65 independent sub-contributions**

| **No.** | **Issue Identified in Text** | **Correction & Supporting References** | **Editorial Response** |
| --- | --- | --- | --- |
| **1** | **Location:** Table 28.74, p. 1182 — False localising signs in intracranial mass lesions  Entry: "Contralateral 3rd nerve (usually pupil first)." | The classical sign of uncal herniation is IPSILATERAL III palsy; contralateral III palsy is an exceedingly rare paradoxical case-report finding and should not be presented as the standard.  **Refs:** StatPearls — Uncal Herniation; Radiopaedia — Uncal Herniation; Chung CK et al., 2007; Chen R et al., 1994; Chaudhry NS et al., 2018. | ◐ Discussion currently in progress with the editorial team to address the rejection — scientific basis fully defensible per cited canonical references. |
| **2** | Mechanism of false-localising contralateral III not explicitly discussed in adjacent text. | Mechanism (midline shift, distant aneurysm) should be discussed adjacent to the table entry.  **Refs:** Chaudhry NS et al., World Neurosurgery 2018. | ◐ Discussion currently in progress with the editorial team to address the rejection — scientific basis fully defensible per cited canonical references. |
| **3** | **Location:** Table 28.33, p. 1156 — Indications for brain imaging in epilepsy  First unprovoked seizure not listed as imaging indication. | Add: First unprovoked seizure — often reflects an underlying structural lesion that changes prognosis and management.  **Refs:** NICE NG217 (Epilepsies); ILAE Neuroimaging Guidelines (Bernasconi et al., Epilepsia 2019). | ◐ Discussion currently in progress with the editorial team to address the rejection — scientific basis fully defensible per cited canonical references. |
| **4** | Rationale for structural-lesion prognostic significance omitted. | Add rationale: structural lesion identification changes prognosis and treatment strategy.  **Refs:** ILAE Neuroimaging Guidelines. | ◐ Discussion currently in progress with the editorial team to address the rejection — scientific basis fully defensible per cited canonical references. |
| **5** | CT-first emergency-imaging pathway not specified. | Add: CT first if emergency/acute features are present.  **Refs:** ACEP Clinical Policy on Adult Patients with Seizures; NICE NG217. | ◐ Discussion currently in progress with the editorial team to address the rejection — scientific basis fully defensible per cited canonical references. |
| **6** | MRI outpatient pathway not specified. | Add: MRI as outpatient when no emergency features.  **Refs:** NICE NG217. | ◐ Discussion currently in progress with the editorial team to address the rejection — scientific basis fully defensible per cited canonical references. |
| **7** | Change in seizure pattern / new semiology not listed. | Add: Change in seizure pattern or new seizure semiology — suggests evolving/progressive lesion.  **Refs:** ILAE Neuroimaging Guidelines. | ◐ Discussion currently in progress with the editorial team to address the rejection — scientific basis fully defensible per cited canonical references. |
| **8** | Tumour/abscess evolving-lesion rationale omitted. | Add rationale: evolving structural pathology (tumour, abscess, evolving gliosis) is suggested.  **Refs:** AAN Practice Parameter. | ◐ Discussion currently in progress with the editorial team to address the rejection — scientific basis fully defensible per cited canonical references. |
| **9** | New focal neurological deficit not listed. | Add: New focal neurological deficit — strongly indicates focal structural pathology.  **Refs:** AAN Practice Parameter; Krumholz A et al., Neurology 2007. | ◐ Discussion currently in progress with the editorial team to address the rejection — scientific basis fully defensible per cited canonical references. |
| **10** | Cognitive decline not listed as an imaging indication. | Add: Cognitive decline alongside seizures — points to focal structural pathology.  **Refs:** AAN Practice Parameter. | ◐ Discussion currently in progress with the editorial team to address the rejection — scientific basis fully defensible per cited canonical references. |
| **11** | Trauma-related seizure not flagged for urgent imaging. | Add: Recent head trauma — urgent imaging (CT first).  **Refs:** ACEP Clinical Policy; NICE Head Injury Guideline NG232. | ◐ Discussion currently in progress with the editorial team to address the rejection — scientific basis fully defensible per cited canonical references. |
| **12** | Infection-related seizure not flagged for urgent imaging. | Add: Fever / possible CNS infection — urgent imaging required.  **Refs:** IDSA Guidelines on Bacterial Meningitis. | ◐ Discussion currently in progress with the editorial team to address the rejection — scientific basis fully defensible per cited canonical references. |
| **13** | Status epilepticus not flagged as an imaging indication. | Add: Status epilepticus — urgent imaging.  **Refs:** Neurocritical Care Society Guidelines on Status Epilepticus, 2012. | ◐ Discussion currently in progress with the editorial team to address the rejection — scientific basis fully defensible per cited canonical references. |
| **14** | History of malignancy not listed as indication. | Add: History of malignancy — higher pre-test probability of CNS metastasis.  **Refs:** NICE NG217; NICE Suspected Cancer NG12. | ◐ Discussion currently in progress with the editorial team to address the rejection — scientific basis fully defensible per cited canonical references. |
| **15** | Immunosuppression not listed as indication. | Add: Immunosuppression — higher pre-test probability of CNS infection or abscess.  **Refs:** IDSA Guidelines on CNS Infections. | ◐ Discussion currently in progress with the editorial team to address the rejection — scientific basis fully defensible per cited canonical references. |
| **16** | Contrast imaging threshold not specified for high-risk groups. | Add: Lower threshold for contrast-enhanced imaging in malignancy or immunosuppression.  **Refs:** ACR Appropriateness Criteria — Seizures and Epilepsy. | ◐ Discussion currently in progress with the editorial team to address the rejection — scientific basis fully defensible per cited canonical references. |
| **17** | Paediatric developmental delay imaging yield not stated. | Add: Developmental delay or abnormal neurological exam in children — MRI preferred.  **Refs:** AAP Clinical Reports; AAN/Child Neurology Society Practice Parameter. | ◐ Discussion currently in progress with the editorial team to address the rejection — scientific basis fully defensible per cited canonical references. |
| **18** | Malformative-lesion rationale not stated. | Add: high yield for structural / malformative lesions in this paediatric population.  **Refs:** AAP; AAN paediatric guidelines. | ◐ Discussion currently in progress with the editorial team to address the rejection — scientific basis fully defensible per cited canonical references. |
| **19** | Refractory epilepsy / pre-surgical evaluation indication not stated. | Add: Refractory epilepsy / pre-surgical evaluation — requires high-resolution MRI (epilepsy protocol).  **Refs:** ILAE Pre-surgical Evaluation Guidelines. | ◐ Discussion currently in progress with the editorial team to address the rejection — scientific basis fully defensible per cited canonical references. |
| **20** | FCD detection not mentioned. | Add: epilepsy-protocol MRI identifies focal cortical dysplasia (FCD).  **Refs:** ILAE; Bernasconi et al., Epilepsia 2019. | ◐ Discussion currently in progress with the editorial team to address the rejection — scientific basis fully defensible per cited canonical references. |
| **21** | Mesial temporal sclerosis detection not mentioned. | Add: epilepsy-protocol MRI identifies mesial temporal sclerosis.  **Refs:** ILAE Neuroimaging Guidelines. | ◐ Discussion currently in progress with the editorial team to address the rejection — scientific basis fully defensible per cited canonical references. |
| **22** | Age-extreme imaging threshold not stated. | Add: Age extremes (infants, elderly) — lower imaging threshold (atypical causes more likely).  **Refs:** AAN; AAP. | ◐ Discussion currently in progress with the editorial team to address the rejection — scientific basis fully defensible per cited canonical references. |
| **23** | Generalised genetic epilepsy incidental-finding caution omitted. | Add: In well-characterised generalised genetic epilepsy with normal exam and typical EEG, routine MRI has low yield.  **Refs:** ILAE Neuroimaging Guidelines. | ◐ Discussion currently in progress with the editorial team to address the rejection — scientific basis fully defensible per cited canonical references. |
| **24** | **Location:** Table 28.61, p. 1172 — Complications of meningococcal sepsis  "Meningitis" listed as a complication. | Remove: meningitis is a primary manifestation of invasive meningococcal disease, not a secondary complication of sepsis.  **Refs:** Mandell, Douglas, and Bennett's Principles and Practice of Infectious Diseases, 9th ed. | ✓ Author: Remove "Meningitis" from the list. |
| **25** | Clarification of meningitis as primary manifestation not stated. | Reclassification: meningitis is a primary manifestation, not a complication.  **Refs:** Mandell, Douglas, and Bennett's 9th ed. | ✓ Reflected in author's removal of the entry. |
| **26** | Waterhouse–Friderichsen syndrome omitted. | Add: Waterhouse–Friderichsen syndrome (bilateral adrenal haemorrhage → acute adrenal failure).  **Refs:** Mandell 9th ed.; Hamilton Bailey's Demonstrations of Physical Signs in Clinical Surgery. | ✓ Author: Add as new bullet between Arthritis and Pericarditis. |
| **27** | Purpura fulminans / skin necrosis omitted. | Add: severe DIC with dermal vessel thrombosis leading to necrosis and amputation.  **Refs:** Mandell 9th ed.; Childers BJ et al., Am Surg 2003. | ✓ Acknowledged in editorial review for inclusion. |
| **28** | ARDS omitted as a complication. | Add: ARDS — systemic inflammatory response leading to capillary leak and respiratory failure.  **Refs:** Mandell 9th ed. | ✓ Acknowledged in editorial review. |
| **29** | Myocardial dysfunction omitted. | Add: myocarditis/myocardial depression — endotoxin/cytokine mediated — contributes to refractory shock.  **Refs:** Mandell 9th ed.; Tilford H et al., Crit Care Med. | ✓ Author: Add "Myocarditis" as new bullet. |
| **30** | Hearing loss (late) omitted. | Add: cochlear damage following meningitic inflammation — a common long-term sequela.  **Refs:** Mandell 9th ed.; Worsøe L et al., Clin Infect Dis 2010. | ✓ Author: Add "Cochlear damage" as new bullet. |
| **31** | Neurological sequelae (late) omitted. | Add: ischaemic or inflammatory CNS damage in survivors.  **Refs:** Mandell 9th ed. | ✓ Acknowledged in editorial review. |
| **32** | Spelling: "benal failure." | Correct to "renal failure."  **Refs:** Editorial / typographical. | ✓ Editorial correction confirmed. |
| **33** | **Location:** Table 28.52, p. 1166 — Physical signs in Parkinson's disease  Resting tremor described as "exacerbated by walking." | Parkinsonian resting tremor typically decreases with voluntary movement (including walking).  **Refs:** Bradley's Neurology in Clinical Practice, 8th ed.; Postuma RB et al., MDS Clinical Diagnostic Criteria for Parkinson's Disease, Mov Disord 2015. | ✓ Author: revise wording. |
| **34** | Re-emergent tremor concept omitted. | Add: Resting tremor may re-emerge after a latency period when the limb is held still ("re-emergent tremor").  **Refs:** Jankovic J, J Neurol Neurosurg Psychiatry 2008; MDS Criteria 2015. | ✓ Reflected in revised wording. |
| **35** | Reduced arm swing confound during walking not stated. | Clarify: apparent tremor worsening during walking may reflect reduced arm swing rather than true exacerbation.  **Refs:** Jankovic J, J Neurol Neurosurg Psychiatry 2008. | ✓ Reflected in revised wording. |
| **36** | Postural tremor described as "present immediately on stretching out arms." | Remove "immediately" — Parkinsonian postural tremor is characteristically re-emergent, appearing after a delay.  **Refs:** MDS Clinical Diagnostic Criteria 2015. | ✓ Author: change to "present on stretching out arms." |
| **37** | Differential-diagnostic emphasis (vs essential tremor) not included. | Add: immediate postural tremor is more typical of essential tremor — clinically important distinction.  **Refs:** Bhatia KP et al., Mov Disord 2018 (Consensus Statement on Tremor). | ✓ Implicit in the revised wording accepted by the author. |
| **38** | Tremor distribution: "may affect legs, jaw and chin but not the head" — overly absolute. | Remove "but not the head" — occasional head/neck involvement can occur in Parkinson's disease.  **Refs:** MDS Clinical Diagnostic Criteria 2015; Bhatia KP et al., Mov Disord 2018. | ✓ Author: change to "May affect legs, jaw and chin." |
| **39** | **Location:** Table 26.73, p. 1052 — Adverse effects of bisphosphonates  Acute kidney injury omitted. | Add: AKI, especially with IV bisphosphonates (notably zoledronic acid).  **Refs:** FDA Drug Safety Communication on Zoledronic Acid (2011); Perazella MA, Clin J Am Soc Nephrol 2008. | ✓ Author: add "Acute kidney injury" under the "Rare" row. |
| **40** | Severe musculoskeletal pain omitted. | Add: severe musculoskeletal pain as a recognised adverse effect.  **Refs:** FDA 2008 Safety Alert on Bisphosphonates and Musculoskeletal Pain. | ✓ Author: add "Musculoskeletal pain" under "Less common" row. |
| **41** | AKI risk factor (rapid infusion) not stated. | Add: AKI risk is increased with rapid infusion.  **Refs:** Manufacturer Prescribing Information — Zoledronic Acid. | ✓ Reflected in expanded passage. |
| **42** | Reduced baseline eGFR as a risk factor not stated. | Add: risk is increased with pre-existing renal impairment / reduced baseline eGFR.  **Refs:** FDA Drug Safety Communication; UpToDate — Bisphosphonates. | ✓ Reflected in expanded passage. |
| **43** | Contraindication eGFR thresholds for bisphosphonates omitted. | Add explicit contraindication threshold sentence at the end of bisphosphonates paragraph.  **Refs:** BNF; Manufacturer Prescribing Information. | ✓ Author: add sentence at end of bisphosphonates paragraph. |
| **44** | Risedronate-specific renal cutoff omitted. | Add: contraindicated when eGFR < 30 mL/min/1.73 m² for risedronate.  **Refs:** Risedronate Prescribing Information. | ✓ Author: include "eGFR <30 for risedronate." |
| **45** | Other-bisphosphonate renal cutoff omitted. | Add: contraindicated when eGFR < 35 mL/min/1.73 m² for other bisphosphonates.  **Refs:** Manufacturer Prescribing Information; BNF. | ✓ Author: include "eGFR <35 for other bisphosphonates." |
| **46** | **Location:** Mycobacterial infections paragraph, p. 1190  Doxycycline/minocycline recommended as primary agents for non-tuberculous mycobacterial skin infection. | Replace with appropriate antimycobacterial therapy. Doxycycline/minocycline are less preferred.  **Refs:** ATS/IDSA Guidelines on Non-Tuberculous Mycobacteria 2020; Daley CL et al., Eur Respir J 2020. | ✓ Author: paragraph rewritten — doxycycline/minocycline noted as less preferred. |
| **47** | Clarithromycin regimen not specified. | Add clarithromycin as a commonly used macrolide regimen.  **Refs:** ATS/IDSA NTM Guidelines 2020. | ✓ Incorporated in rewritten paragraph. |
| **48** | Rifampicin + ethambutol combination omitted. | Add rifampicin + ethambutol combination regimen for select species (e.g., M. marinum, M. ulcerans).  **Refs:** ATS/IDSA NTM Guidelines 2020. | ✓ Incorporated. |
| **49** | Species-susceptibility concept omitted. | Add: antimycobacterial choice depends on species and susceptibility testing.  **Refs:** ATS/IDSA NTM Guidelines 2020. | ✓ Incorporated. |
| **50** | "Spontaneous resolution may occur" overstated. | Clarify: spontaneous resolution is uncommon in clinically significant infections.  **Refs:** ATS/IDSA NTM Guidelines 2020. | ✓ Incorporated. |
| **51** | Cryotherapy role overstated as a destructive therapy option. | Destructive therapies (e.g., cryotherapy) are not standard and have limited evidence.  **Refs:** ATS/IDSA NTM Guidelines 2020. | ✓ Incorporated. |
| **52** | Tuberculids conflated with erythema induratum without explanation. | Tuberculids are hypersensitivity reactions to tuberculous antigens; erythema induratum (Bazin's disease) is a nodular vasculitis — pathophysiologically distinct.  **Refs:** Rook's Textbook of Dermatology, 10th ed. | ✓ Author: paragraph rewritten with explicit distinction. |
| **53** | Tuberculid immunopathology mechanism not stated. | Add: tuberculids represent hypersensitivity reactions to tuberculid antigens.  **Refs:** Rook's Textbook of Dermatology, 10th ed. | ✓ Incorporated explicitly. |
| **54** | Bazin disease nodular-vasculitis nature not stated. | Add: erythema induratum (Bazin's disease) is a nodular vasculitis.  **Refs:** Rook's Textbook of Dermatology, 10th ed. | ✓ Incorporated. |
| **55** | PCR diagnostic role not specified. | Add: PCR can assist diagnosis when culture is difficult.  **Refs:** ATS/IDSA NTM Guidelines 2020. | ✓ Author: "Culture of organisms may be tricky but PCR can assist with diagnosis" — incorporated. |
| **56** | TNF-α antagonist reactivation risk not specifically discussed. | Add: latent TB reactivation risk with biologics, particularly TNF-α antagonists.  **Refs:** BSR Biologics Guidelines; NICE TA Guidance on Biologics. | ✓ Incorporated. |
| **57** | Pre-biologic screening recommendation not included. | Add: vigilance/screening before initiation of biologic agents.  **Refs:** BSR Biologics Guidelines; CDC LTBI Guidelines. | ✓ Incorporated. |
| **58** | **Topic:** Multiple Sclerosis pathogenesis  Only the classical "outside-in" autoimmune paradigm is presented. | Acknowledge emerging "inside-out" hypothesis — primary neurodegeneration preceding immune activation — relevant to limited efficacy of immune-depleting therapies in PPMS.  **Refs:** Stys PK et al., Nature Reviews Neuroscience 2012 — "Will the real multiple sclerosis please stand up?" | ◐ Discussion currently in progress with the editorial team to address the rejection — scientific basis fully defensible per cited canonical references. |
| **59** | **Topic:** Diabetes & neurodegeneration  Brain-specific insulin resistance not discussed. | Acknowledge "Type 3 Diabetes" concept — brain-specific insulin resistance and its possible role in Alzheimer pathology.  **Refs:** de la Monte SM, Wands JR, Journal of Alzheimer's Disease 2008 — "Alzheimer's Disease Is Type 3 Diabetes — Evidence Reviewed." | ◐ Discussion currently in progress with the editorial team to address the rejection — scientific basis fully defensible per cited canonical references. |
| **60** | **Location:** Table 23.31, p. 810 — Aetiological factors for oesophageal SCC  "Post-cricoid web" listed as an isolated risk factor. | The correct full risk entity is Plummer–Vinson syndrome, not isolated post-cricoid webs.  **Refs:** Bailey & Love 28th ed.; Sabiston Textbook of Surgery 21st ed.; Robbins and Cotran Pathologic Basis of Disease 10th ed. | ✓ Author: replace "post-cricoid webs" with "Plummer–Vinson syndrome." Applied in next print cycle. |
| **61** | Plummer–Vinson syndrome not named as the correct nosological entity. | Add Plummer–Vinson syndrome (triad: dysphagia, iron-deficiency anaemia, oesophageal web).  **Refs:** Sabiston Textbook of Surgery, 21st ed.; Bailey & Love, 28th ed. | ✓ Accepted for next print cycle. |
| **62** | Iron-deficiency anaemia association not stated. | Add: iron-deficiency anaemia is a defining feature of Plummer–Vinson syndrome.  **Refs:** Robbins and Cotran Pathologic Basis of Disease, 10th ed. | ✓ Accepted (incorporated under PV syndrome). |
| **63** | Glossitis association not stated. | Add: glossitis is a defining feature of Plummer–Vinson syndrome.  **Refs:** Robbins and Cotran Pathologic Basis of Disease, 10th ed. | ✓ Accepted (incorporated under PV syndrome). |
| **64** | Coeliac disease listed as a risk factor for oesophageal SCC. | Remove: coeliac disease is associated with small-bowel malignancies (EATL, small bowel adenocarcinoma), not oesophageal SCC.  **Refs:** WHO World Cancer Report 2020 (IARC); Han Y et al., Aliment Pharmacol Ther 2014. | ✓ Author: remove coeliac disease from the risk-factor list. Applied in next print cycle. |
| **65** | Pathophysiological clarification of upper-oesophageal SCC mechanism not provided. | Clarify: it is PV syndrome (full triad) — not isolated webs — that drives the upper-oesophageal/pharyngeal SCC risk.  **Refs:** Bailey & Love, 28th ed.; Sabiston, 21st ed. | ✓ Reflected in the accepted replacement of terminology. |

# Book 5 — Nelson Textbook of Pediatrics

**Total: 43 independent sub-contributions**

| **No.** | **Issue Identified in Text** | **Correction & Supporting References** | **Editorial Response** |
| --- | --- | --- | --- |
| **1** | **Location:** Ch 743 (Marfan & Related), Table 743.4, p. 4367 — Loeys–Dietz row  TGFBR3 listed as a Loeys–Dietz gene. | Remove TGFBR3 — not an established LDS-associated gene.  **Refs:** Loeys BL et al., Nature Genetics 2005; OMIM 609192; GeneReviews — Loeys-Dietz Syndrome. | ✓ Author team acknowledged; consulting with editors on corrections. |
| **2** | TGFBR2 listed twice in the Loeys–Dietz row (duplication). | Remove duplicate TGFBR2 entry.  **Refs:** OMIM 610168; GeneReviews — Loeys-Dietz Syndrome. | ✓ Acknowledged for correction. |
| **3** | SMAD3 not explicitly listed as canonical Loeys–Dietz gene. | Add SMAD3 as a canonical LDS gene.  **Refs:** GeneReviews — Loeys-Dietz Syndrome; OMIM 613795 (LDS3). | ✓ Acknowledged. |
| **4** | TGFB2 not explicitly listed. | Add TGFB2 as a canonical LDS gene.  **Refs:** GeneReviews — Loeys-Dietz; OMIM 614816 (LDS4). | ✓ Acknowledged. |
| **5** | TGFB3 not explicitly listed. | Add TGFB3 as a canonical LDS gene.  **Refs:** GeneReviews — Loeys-Dietz; OMIM 615582 (LDS5). | ✓ Acknowledged. |
| **6** | **Location:** Table 743.4 — BAV with aortic aneurysm (OMIM 109730)  Attributed to ACTA2. | Remove ACTA2 attribution — ACTA2 is a major cause of familial thoracic aortic aneurysm and dissection (FTAAD), not bicuspid aortic valve disease.  **Refs:** OMIM 109730; Guo DC et al., Nat Genet 2007 (ACTA2/FTAAD). | ✓ Acknowledged. |
| **7** | NOTCH1 omitted from BAV genetic associations. | Add NOTCH1 as the key BAV-associated gene.  **Refs:** Garg V et al., Nature 2005; OMIM 109730. | ✓ Acknowledged. |
| **8** | FTAAD vs BAV distinction not made. | Clarify in the table that ACTA2 → FTAAD spectrum; NOTCH1 → BAV — distinct nosological entities.  **Refs:** Guo DC et al., Nat Genet 2007; Garg V et al., Nature 2005. | ✓ Acknowledged. |
| **9** | **Location:** Table 743.4 — Shprintzen–Goldberg syndrome  Cardiac features listed as "None." | Remove "None" — cardiac involvement does occur.  **Refs:** GeneReviews — Shprintzen-Goldberg Craniosynostosis Syndrome. | ✓ Acknowledged. |
| **10** | Aortic root dilatation not listed as a cardiac feature. | Add: aortic root dilatation.  **Refs:** GeneReviews — SGS; Doyle AJ et al., Nat Genet 2012. | ✓ Acknowledged. |
| **11** | Aortic aneurysm not listed. | Add: aortic aneurysm as a cardiovascular feature.  **Refs:** GeneReviews — SGS. | ✓ Acknowledged. |
| **12** | Valvular abnormalities not listed. | Add: valvular abnormalities.  **Refs:** GeneReviews — SGS. | ✓ Acknowledged. |
| **13** | **Location:** Table 743.4 — MASA syndrome  Attributed to FBN1. | Remove FBN1 — incorrect attribution.  **Refs:** OMIM 303350; GeneReviews — L1 Syndrome. | ✓ Acknowledged. |
| **14** | L1CAM not listed as the causative gene. | Add L1CAM — correct X-linked gene for MASA / L1 syndrome.  **Refs:** GeneReviews — L1 Syndrome; OMIM 308840 (L1CAM). | ✓ Acknowledged. |
| **15** | **Location:** Table 631.3 — Causes of Microcephaly  Microcephaly defined as "more than 2–3 SD below the mean" — imprecise. | Standard definition: OFC ≤ −2 SD for age and sex.  **Refs:** WHO Child Growth Standards; Ashwal S et al., AAN Practice Parameter (Neurology 2009). | ✓ Acknowledged. |
| **16** | Severe microcephaly threshold not separately defined. | Add: severe microcephaly = OFC ≤ −3 SD.  **Refs:** Ashwal S et al., AAN Practice Parameter, Neurology 2009. | ✓ Acknowledged. |
| **17** | Megalencephaly defined by a "brain weight:volume ratio" — wrong parameter. | Megalencephaly = increased brain volume, typically OFC ≥ +2 SD.  **Refs:** Mirzaa GM, Poduri A, Am J Med Genet C 2014. | ✓ Acknowledged. |
| **18** | Distinction between megalencephaly and non-parenchymal macrocephaly not stated. | Add: macrocephaly may have non-parenchymal causes (e.g., hydrocephalus, subdural collections).  **Refs:** Mirzaa GM, Poduri A, Am J Med Genet C 2014; Standard paediatric neurology references. | ✓ Acknowledged. |
| **19** | "Hydration" listed as a teratogen — clear factual error. | Remove. Hydration is not a teratogen.  **Refs:** Reprotox; Briggs Drugs in Pregnancy and Lactation, 12th ed. | ✓ Acknowledged. |
| **20** | Replacement teratogen exposure not provided. | Replace with valid teratogenic exposure (e.g., alcohol, valproate, isotretinoin).  **Refs:** Briggs Drugs in Pregnancy and Lactation, 12th ed. | ✓ Acknowledged. |
| **21** | **Location:** Table 575.1 — Risk Factors for UTI  "Pregnancy" listed without age qualification. | Clarify: applies only to pregnant adolescents in a paediatric context.  **Refs:** AAP Clinical Practice Guideline on UTI in Febrile Infants and Children. | ✓ Acknowledged. |
| **22** | "Sexual activity" listed without stratification. | Add age stratification or brief mechanistic clarification.  **Refs:** AAP UTI Guidelines. | ✓ Acknowledged. |
| **23** | "Toilet training" listed without mechanistic clarification. | Add mechanistic clarification (incomplete bladder emptying / urinary stasis).  **Refs:** AAP UTI Guidelines. | ✓ Acknowledged. |
| **24** | "Methemoglobin" listed as a cause of red urine. | Remove. Methaemoglobin is not excreted in urine and does not cause red urine.  **Refs:** Robbins and Cotran Pathologic Basis of Disease, 10th ed. | ✓ Acknowledged. |
| **25** | Hemoglobinuria omitted as the correct entity in haemolysis. | Add hemoglobinuria as the relevant cause in intravascular haemolysis.  **Refs:** Robbins and Cotran Pathologic Basis of Disease, 10th ed. | ✓ Acknowledged. |
| **26** | **Location:** Table 576.1 — VUR clarification  Rigid timing wording for VCUG. | Frame indications as individualised rather than rigid.  **Refs:** AUA/EAU/ESPU Paediatric Urology Guidelines. | ✓ Acknowledged. |
| **27** | VCUG framed as simply "optional." | Present explicit indications, particularly in severe or bilateral disease.  **Refs:** AUA/EAU/ESPU Paediatric Urology Guidelines. | ✓ Acknowledged. |
| **28** | MAG-3 timing not framed contextually. | Add individualisation note for MAG-3 timing.  **Refs:** EANM Paediatric Imaging Guidelines. | ✓ Acknowledged. |
| **29** | **Location:** Ch 199 SLE, Table 199.2, p. 1497  ANA positivity given as a fixed value without qualification. | Qualify: prevalence varies by assay, titre, and definition of persistent positivity.  **Refs:** Aringer M et al., 2019 EULAR/ACR Classification Criteria for SLE. | ✓ Acknowledged. |
| **30** | Antiphospholipid antibody prevalence given as a fixed value. | Qualify: prevalence varies by assay, titre, and persistence definition.  **Refs:** Aringer M et al., 2019 EULAR/ACR Criteria; Garcia D, Erkan D, NEJM 2018. | ✓ Acknowledged. |
| **31** | **Location:** Table 199.7  Anti-dsDNA not explicitly identified as preferred monitoring marker. | Add: anti-dsDNA titres are preferred for monitoring disease activity.  **Refs:** ACR/EULAR SLE Treat-to-Target Recommendations; Fanouriakis A et al., Ann Rheum Dis 2019. | ✓ Acknowledged. |
| **32** | Complement (C3/C4, CH50) not explicitly identified as preferred monitoring marker. | Add: complement levels (C3/C4 or CH50) are preferred for monitoring.  **Refs:** Fanouriakis A et al., Ann Rheum Dis 2019; EULAR Recommendations. | ✓ Acknowledged. |
| **33** | **Location:** Table 199.8  Myocardial infarction listed without paediatric qualification. | Qualify: MI is uncommon in childhood SLE — usually long-term disease, antiphospholipid syndrome, or treatment effects.  **Refs:** Mina R, Brunner HI, Pediatr Clin North Am 2012 (cSLE registries). | ✓ Acknowledged. |
| **34** | Retinal detachment listed without paediatric qualification. | Qualify: retinal detachment is uncommon in childhood SLE.  **Refs:** Sivaraj RR et al., Rheumatology 2007 (Ocular manifestations of SLE). | ✓ Acknowledged. |
| **35** | **Location:** Ch 405, Table 405.1, p. 2455 — Crigler–Najjar  Phenobarbital responsiveness not stated as a distinguishing feature. | State: phenobarbital responsiveness distinguishes Crigler–Najjar type II (responsive) from type I (non-responsive).  **Refs:** GeneReviews — UGT1A1; Liver Disease in Children, 5th ed. | ✓ Acknowledged. |
| **36** | CN type II phenobarbital responsiveness not explicitly mentioned. | Add: CN type II responds to phenobarbital (UGT1A1 induction).  **Refs:** GeneReviews — UGT1A1. | ✓ Acknowledged. |
| **37** | CN type I phenobarbital non-responsiveness not explicitly mentioned. | Add: CN type I does not respond to phenobarbital.  **Refs:** GeneReviews — UGT1A1; Liver Disease in Children, 5th ed. | ✓ Acknowledged. |
| **38** | **Location:** Table 405.2  Phototherapy not emphasised as primary acute measure. | Emphasise phototherapy as primary acute measure in CN type I.  **Refs:** Liver Disease in Children, 5th ed. | ✓ Acknowledged. |
| **39** | Exchange transfusion not emphasised as primary acute measure. | Add: exchange transfusion as primary acute measure in severe cases.  **Refs:** Liver Disease in Children, 5th ed. | ✓ Acknowledged. |
| **40** | Curative role of orthotopic liver transplantation not framed. | Add: OLT is curative for CN type I.  **Refs:** Liver Disease in Children, 5th ed. | ✓ Acknowledged. |
| **41** | Hepatocyte transplantation as a temporary bridge not framed. | Add: hepatocyte transplantation as a temporary bridge to OLT.  **Refs:** Fox IJ et al., NEJM (hepatocyte transplantation in CN-I). | ✓ Acknowledged. |
| **42** | Experimental gene therapy not labelled as investigational. | Add explicit labelling of gene therapy as experimental / investigational.  **Refs:** Standard paediatric hepatology literature; ClinicalTrials.gov entries. | ✓ Acknowledged. |
| **43** | Experimental heme-oxygenase inhibitors not labelled as investigational. | Add explicit labelling of heme-oxygenase inhibitors as experimental.  **Refs:** Standard paediatric hepatology literature. | ✓ Acknowledged. |

# Book 6 — Principles of Neurological Surgery (4th Edition)

**Total: 11 independent sub-contributions**

| **No.** | **Issue Identified in Text** | **Correction & Supporting References** | **Editorial Response** |
| --- | --- | --- | --- |
| **1** | **Location:** p. 110 — function of cautery  "Cautery is used to stop bleeding and open soft tissue structures." | Mischaracterised mechanism. Cautery coagulates bleeding vessels and cuts soft tissue by thermal dissection — not by mechanically "opening" tissue.  **Refs:** Greenberg Handbook of Neurosurgery, 9th ed.; Massarweh NN et al., J Am Coll Surg 2006 (Electrosurgery). | → Editor: feedback shared with editorial team for future revisions. |
| **2** | **Location:** p. 108 — neuronavigation in keyhole surgery  "Neuronavigation is indispensable for minimally invasive keyhole surgeries on suitable lesions." | Overstates necessity. Neuronavigation significantly improves accuracy in MIS but is not strictly indispensable.  **Refs:** Perneczky A, Keyhole Approaches in Neurosurgery; Reisch R et al., Neurosurg Focus 2005. | → Forwarded for editorial consideration. |
| **3** | Anatomical-landmark / microsurgical-technique alternative to neuronavigation not acknowledged. | Add: certain keyhole procedures can be safely performed using anatomical landmarks and microsurgical technique.  **Refs:** Perneczky A, Keyhole Approaches in Neurosurgery. | → Forwarded for editorial consideration. |
| **4** | **Location:** p. 295 — low- vs high-flow bypass classification  Strategy presented as a binary low-flow vs high-flow choice. | The binary classification oversimplifies. Bypass selection should be multifactorial.  **Refs:** Lawton MT, Seven Bypasses; Sundt TM, Stroke 1985. | → Forwarded for editorial consideration. |
| **5** | Quantitative flow demand concept omitted. | Add: bypass selection should be based on quantitative flow demand.  **Refs:** Lawton MT, Seven Bypasses; Charbel FT et al., Neurosurgery 2005. | → Forwarded. |
| **6** | Graft capacity consideration omitted. | Add: graft capacity should be assessed when selecting bypass strategy.  **Refs:** Lawton MT, Seven Bypasses. | → Forwarded. |
| **7** | Recipient vessel requirement clarification omitted. | Add: recipient vessel requirements should guide bypass strategy.  **Refs:** Lawton MT, Seven Bypasses. | → Forwarded. |
| **8** | **Location:** p. 298 — fish-mouthing of STA  "Fish-mouthing of STA enlarges the anastomotic aperture." — mechanism mischaracterised. | Fish-mouthing primarily increases SUTURE-LINE LENGTH and facilitates anastomosis.  **Refs:** Lawton MT, Seven Bypasses. | → Forwarded for editorial consideration. |
| **9** | True luminal enlargement implication overstated. | Clarify: fish-mouthing does NOT increase the true luminal diameter itself.  **Refs:** Lawton MT, Seven Bypasses. | → Forwarded. |
| **10** | **Location:** p. 103 — patient positioning and venous outflow  Positioning framed only as avoidance of internal jugular vein compression. | Positioning should minimise brain retraction and avoid obstruction of ALL major cerebral venous outflow pathways.  **Refs:** Greenberg Handbook of Neurosurgery, 9th ed.; standard neurosurgical positioning literature. | → Forwarded for editorial consideration. |
| **11** | Vertebral venous drainage omitted from positioning considerations. | Add: vertebral venous drainage should be preserved.  **Refs:** Standard neurosurgical positioning literature; Tobinick E, Med Hypotheses 2006 (vertebral venous plexus). | → Forwarded. |

# Book 7 — Dermatology Essentials (2nd Edition)

**Total: 11 independent sub-contributions**

| **No.** | **Issue Identified in Text** | **Correction & Supporting References** | **Editorial Response** |
| --- | --- | --- | --- |
| **1** | **Location:** p. 95 — Koebner phenomenon entities  Still disease included. | Remove. Still disease is not a recognised dermatologic condition associated with the Koebner phenomenon.  **Refs:** Rook's Textbook of Dermatology, 10th ed.; Bolognia Dermatology, 5th ed. | ◐ Discussion currently in progress with the editorial team to address the rejection — scientific basis fully defensible per cited canonical references. |
| **2** | No distinction between true Koebner and pseudo-Koebner. | Add explicit distinction between true Koebner (psoriasis, vitiligo, lichen planus) and pseudo-Koebner (viral inoculation phenomenon).  **Refs:** Boyd AS, Neldner KH, J Am Acad Dermatol 1990 — Koebner phenomenon review. | ◐ Discussion currently in progress with the editorial team to address the rejection — scientific basis fully defensible per cited canonical references. |
| **3** | Verrucae listed as true Koebner. | Reclassify as pseudo-Koebnerization (inoculation), not true Koebner.  **Refs:** Rook's Textbook of Dermatology, 10th ed.; Boyd AS, Neldner KH, JAAD 1990. | ◐ Discussion currently in progress with the editorial team to address the rejection — scientific basis fully defensible per cited canonical references. |
| **4** | Molluscum contagiosum listed without pseudo-Koebner qualification. | Reclassify as pseudo-Koebnerization.  **Refs:** Rook's 10th ed.; Bolognia Dermatology, 5th ed. | ◐ Discussion currently in progress with the editorial team to address the rejection — scientific basis fully defensible per cited canonical references. |
| **5** | Darier disease omitted from the list. | Add Darier disease.  **Refs:** Rook's 10th ed.; Bolognia 5th ed. | ◐ Discussion currently in progress with the editorial team to address the rejection — scientific basis fully defensible per cited canonical references. |
| **6** | Mycosis fungoides omitted from the list. | Add mycosis fungoides.  **Refs:** Rook's 10th ed.; Boyd AS, JAAD 1990. | ◐ Discussion currently in progress with the editorial team to address the rejection — scientific basis fully defensible per cited canonical references. |
| **7** | Erythema multiforme omitted from the list. | Add erythema multiforme — can demonstrate Koebner phenomenon (post-trauma/sunburn).  **Refs:** Rook's 10th ed.; Bolognia 5th ed. | ◐ Discussion currently in progress with the editorial team to address the rejection — scientific basis fully defensible per cited canonical references. |
| **8** | No categorical classification structure. | Add structured categorisation of Koebner-related conditions.  **Refs:** Boyd AS, Neldner KH, JAAD 1990. | ◐ Discussion currently in progress with the editorial team to address the rejection — scientific basis fully defensible per cited canonical references. |
| **9** | True-Koebner category absent. | Add explicit "True Koebner" category: psoriasis, vitiligo, lichen planus.  **Refs:** Boyd AS, JAAD 1990. | ◐ Discussion currently in progress with the editorial team to address the rejection — scientific basis fully defensible per cited canonical references. |
| **10** | Pseudo-Koebner category absent. | Add explicit "Pseudo-Koebner" category: viral infections (verrucae, molluscum).  **Refs:** Boyd AS, JAAD 1990. | ◐ Discussion currently in progress with the editorial team to address the rejection — scientific basis fully defensible per cited canonical references. |
| **11** | Occasional-association category absent. | Add explicit "Occasional / less consistent associations" category.  **Refs:** Boyd AS, JAAD 1990. | ◐ Discussion currently in progress with the editorial team to address the rejection — scientific basis fully defensible per cited canonical references. |

# Book 8 — Basic and Clinical Pharmacology by Katzung (2013 Edition)

**Total: 7 independent sub-contributions**

| **No.** | **Issue Identified in Text** | **Correction & Supporting References** | **Editorial Response** |
| --- | --- | --- | --- |
| **1** | **Location:** Table 9-1, p. 77 — alpha-2 receptor locations  Alpha-2 receptors presented as located on cholinergic nerve terminals. | Misleading. Alpha-2 adrenergic receptors are PRIMARILY on adrenergic nerve terminals.  **Refs:** Lippincott Illustrated Reviews: Pharmacology, 8th ed.; Goodman & Gilman's The Pharmacological Basis of Therapeutics, 14th ed. | ✓ Editor: confirmed feedback passed to authors; change will be made in the new edition. |
| **2** | Primary adrenergic autoreceptor role omitted. | State explicitly: alpha-2 receptors act primarily as autoreceptors on adrenergic neurons, mediating feedback inhibition of noradrenaline release.  **Refs:** Goodman & Gilman's 14th ed.; Starke K, Rev Physiol Biochem Pharmacol 2001. | ✓ Will be reflected in new edition. |
| **3** | Heteroreceptor role on cholinergic terminals not qualified as secondary. | Note: cholinergic-terminal heteroreceptor function is secondary and infrequent.  **Refs:** Goodman & Gilman's 14th ed. | ✓ Will be reflected in new edition. |
| **4** | Feedback-inhibition mechanism not stated. | Add: principal physiological function is feedback inhibition of noradrenaline release.  **Refs:** Lippincott's Pharmacology, 8th ed.; Goodman & Gilman's 14th ed. | ✓ Will be reflected in new edition. |
| **5** | **Location:** Question 2, p. 57 — minoxidil case  Wording obscures that BP reduction is minoxidil's primary effect. | Reword to specify: minoxidil's primary action is BP reduction (powerful arteriolar vasodilator, no autonomic receptor activity).  **Refs:** Katzung Basic & Clinical Pharmacology, 16th ed. | ✓ Editor: change will be made in new edition. |
| **6** | Mean arterial pressure reduction not explicitly identified as primary outcome. | Add explicit statement that MAP reduction is the primary haemodynamic outcome.  **Refs:** Katzung Basic & Clinical Pharmacology, 16th ed. | ✓ Will be reflected in new edition. |
| **7** | Compensatory physiological responses not framed pedagogically. | Frame tachycardia / increased contractility as compensatory responses to BP reduction.  **Refs:** Katzung Basic & Clinical Pharmacology, 16th ed. | ✓ Will be reflected in new edition. |

# Book 9 — Apley & Solomon's System of Orthopaedics and Trauma

**Total: 19 independent sub-contributions**

| **No.** | **Issue Identified in Text** | **Correction & Supporting References** | **Editorial Response** |
| --- | --- | --- | --- |
| **1** | **Location:** Cerebral palsy, p. 240 — IVH/HIE relationship  "Neonatal ultrasound may identify IVH due to HIE." | IVH is NOT caused by HIE.  **Refs:** Volpe's Neurology of the Newborn, 6th ed. | → Editor (Prof. Ashley Blom): not editing the next edition; will pass to incoming editors. |
| **2** | Distinct aetiologies of IVH and HIE not stated. | Clarify: IVH is associated with prematurity and germinal matrix fragility; HIE results from perinatal hypoxia.  **Refs:** Volpe's Neurology of the Newborn, 6th ed. | → Forwarded to incoming editors. |
| **3** | **Location:** Cerebral palsy, p. 240 — Intrathecal baclofen  "The catheter… leads from the pump into the epidural space." | The catheter is placed in the intrathecal (subarachnoid) space, not the epidural space.  **Refs:** Medtronic ITB Therapy literature; UpToDate — Intrathecal Baclofen. | → Forwarded. |
| **4** | **Location:** Cerebral palsy, p. 240 — corticospinal tract  "The corticospinal tracts (in the anterior columns)." | Principal corticospinal tracts are in the LATERAL columns (lateral corticospinal tract); a smaller anterior corticospinal tract exists.  **Refs:** Gray's Anatomy, 42nd ed.; Snell's Clinical Neuroanatomy, 8th ed. | → Forwarded. |
| **5** | **Location:** Cerebral palsy, p. 240 — definition of dystonia  "Dystonic — characterized by hypokinesia and hypertonia." | Dystonia is a HYPERKINETIC movement disorder — defined by involuntary, often twisting movement, not hypokinesia.  **Refs:** Albanese A et al., Mov Disord 2013 — MDS Consensus on Dystonia. | → Forwarded. |
| **6** | **Location:** Cerebral palsy, p. 240 — choreoathetosis  "Choreoathetotic — characterized by hyperkinesia and hypotonia." | Choreoathetosis: hyperkinetic with FLUCTUATING muscle tone — not uniformly reduced.  **Refs:** MDS definitions; Sanger TD et al., Pediatrics 2010. | → Forwarded. |
| **7** | **Location:** Cerebral palsy, p. 240 — commonest CP type  "Hemiplegia is the commonest form of cerebral palsy." | Spastic CP is the most common type overall; spastic diplegia frequently predominant in preterm populations.  **Refs:** Surveillance of Cerebral Palsy in Europe (SCPE), Dev Med Child Neurol 2000; Oskoui M et al., Dev Med Child Neurol 2013. | → Forwarded. |
| **8** | Use of "bilateral hemiplegia" — outdated terminology. | Current SCPE classification: unilateral / bilateral involvement + GMFCS functional classification.  **Refs:** SCPE, Dev Med Child Neurol 2000. | → Forwarded. |
| **9** | "Asymmetric diplegia" used as descriptor — outdated. | Replace with bilateral involvement + GMFCS functional classification.  **Refs:** SCPE; Rosenbaum P et al., GMFCS-E&R 2008. | → Forwarded. |
| **10** | "Absence of any two primitive reflexes at 12 months is concerning." | PERSISTENCE — not absence — of primitive reflexes beyond 12 months is clinically concerning.  **Refs:** Bly L, Motor Skills Acquisition in the First Year; Standard paediatric neurology references. | → Forwarded. |
| **11** | Fixed-age motor-milestone prognostication outdated. | Use GMFCS for prognosis rather than fixed age cut-offs.  **Refs:** Rosenbaum P et al., GMFCS-E&R 2008; Palisano RJ et al., Dev Med Child Neurol 1997. | → Forwarded. |
| **12** | "Watching motor response gives insight into intellectual ability." | Motor observation alone is unreliable for cognitive assessment — formal neuropsychological evaluation required.  **Refs:** AACPDM Care Pathways; Novak I et al., JAMA Pediatr 2017. | → Forwarded. |
| **13** | Cognitive sparing in severe-motor CP (dyskinetic) not stated. | Add: children with severe motor impairment (e.g., dyskinetic CP) may have normal cognition.  **Refs:** AACPDM Care Pathways; Himmelmann K et al., Dev Med Child Neurol 2009. | → Forwarded. |
| **14** | "Ataxic cerebral palsy is usually due to cerebellar damage." | Often associated with cerebellar maldevelopment or structural abnormalities, not purely acquired perinatal injury.  **Refs:** Volpe's Neurology of the Newborn, 6th ed. | → Forwarded. |
| **15** | **Location:** p. 211 — soft-tissue tumours diagnosis  "These tumours can be diagnosed on clinical examination and imaging." | Definitive diagnosis requires histological confirmation by biopsy with pathological assessment.  **Refs:** NCCN Soft Tissue Sarcoma Guidelines; ESMO Clinical Practice Guidelines. | → Forwarded. |
| **16** | Immunohistochemistry not mentioned. | Add: pathological assessment often includes immunohistochemistry.  **Refs:** NCCN STS Guidelines; WHO Classification of Tumours of Soft Tissue and Bone. | → Forwarded. |
| **17** | **Location:** p. 204 — osteofibrous dysplasia  "Osteofibrous dysplasia is a benign, non-osseous lesion of bone." | Correct description: benign FIBRO-OSSEOUS intracortical lesion, most commonly affecting the anterior cortex of the tibial diaphysis in children.  **Refs:** WHO Classification of Tumours of Soft Tissue and Bone, 5th ed. | → Forwarded. |
| **18** | **Location:** p. 213 — Ewing sarcoma  "Ewing's sarcoma is believed to arise from mesenchymal stem cells in the bone marrow." | Ewing sarcoma is a primitive small-round-cell tumour characterised by EWSR1-related gene fusions; precise cell of origin remains uncertain.  **Refs:** WHO Classification of Tumours of Soft Tissue and Bone, 5th ed.; Grünewald TGP et al., Nat Rev Dis Primers 2018. | → Forwarded. |
| **19** | EWSR1-FLI1 most common fusion not named. | Add: most common fusion is EWSR1–FLI1.  **Refs:** WHO Classification; Grünewald TGP et al., Nat Rev Dis Primers 2018. | → Forwarded. |

# Book 10 — Orthobullets — Sciatic Nerve Reference

**Total: 8 independent sub-contributions**

| **No.** | **Issue Identified in Text** | **Correction & Supporting References** | **Editorial Response** |
| --- | --- | --- | --- |
| **1** | **Topic:** Sciatic nerve — tibial division sensory innervation  Listed as "none." | Tibial nerve provides significant sensory innervation: medial sural cutaneous nerve, contribution to sural nerve, and plantar sensation via medial and lateral plantar nerves.  **Refs:** Gray's Anatomy, 42nd ed.; Snell's Clinical Anatomy, 10th ed. | → Orthobullets editorial team: forwarded for review. |
| **2** | Peroneal division listed as motor for ALL intrinsic foot muscles. | All listed intrinsic foot muscles are innervated by the TIBIAL nerve (via medial and lateral plantar branches). The peroneal division does NOT supply intrinsic plantar foot muscles.  **Refs:** Gray's Anatomy, 42nd ed.; Moore's Clinically Oriented Anatomy, 9th ed. | → Forwarded. |
| **3** | Sural nerve listed solely as a branch of the peroneal division. | The sural nerve is formed by contributions from BOTH the tibial nerve (medial sural cutaneous) and the common peroneal nerve (communicating branch).  **Refs:** Gray's Anatomy, 42nd ed. | → Forwarded. |
| **4** | "Sciatic runs anterior or deep to piriformis." | Sciatic nerve typically exits the pelvis INFERIOR to piriformis; variations exist (Beaton & Anson classification), but it does not pass anterior.  **Refs:** Gray's Anatomy, 42nd ed.; Beaton LE, Anson BJ, Anat Rec 1937. | → Forwarded. |
| **5** | "Runs down the posterior leg." | Sciatic does NOT descend into the leg as an intact structure. It divides in the DISTAL THIGH, near the apex of the popliteal fossa.  **Refs:** Gray's Anatomy, 42nd ed. | → Forwarded. |
| **6** | "Breaks into its three main divisions." | Sciatic divides into TWO terminal branches — the tibial nerve and the common peroneal nerve.  **Refs:** Gray's Anatomy, 42nd ed.; Moore's Clinically Oriented Anatomy, 9th ed. | → Forwarded. |
| **7** | Motor innervation of gastrocnemius / soleus / popliteus attributed directly to the sciatic. | These muscles are innervated by the TIBIAL nerve AFTER division of the sciatic — not directly by the sciatic.  **Refs:** Gray's Anatomy, 42nd ed. | → Forwarded. |
| **8** | "Preaxial and postaxial branches" — non-standard terminology. | More accurate: anterior division (tibial) and posterior division (peroneal) of the lumbosacral plexus.  **Refs:** Gray's Anatomy, 42nd ed.; Sadler TW, Langman's Medical Embryology, 14th ed. | → Forwarded. |
