# Supplementary material
Source: Research Square preprint supplement (doi:10.21203/rs.3.rs-9861203/v1)
Supplement: Supplementary file 2 [file 8f14797b8e08d1a0289da1be.docx]

**Supplementary Material 2**

**Structured per-event registry — pilot validation data for the five-category taxonomic framework**

**Accompanying manuscript: "Systematic post-publication accuracy assessment in medical educational content: development and pilot validation of a five-category taxonomic framework"**

**Author:** Mohammed Waleed Abdullah · Independent Researcher · Medical Student

*No institutional support, external funding, or third-party collaboration. Sole-authored independent audit.*

**1. Introduction and reading guide**

This document is Supplementary Material 2 to the accompanying BMC Medical Education manuscript. It is a stand-alone publication-grade audit registry that complements — and does not replace — Supplementary Material 1 (the master contribution dossier and editorial archive). Whereas Supplementary Material 1 documents the contribution history and editorial correspondence in narrative form, Supplementary Material 2 provides a structured evidence-verification framework organised by email submission topic, with the sub-contributions and supporting references for each topic itemised within the corresponding row.

**Structure of the registry**

For each of the ten audited resources, a single table presents the topics that were submitted to the publisher or editor. Each row of the table is one email submission topic; the sub-contributions within that topic are listed inside the row, each with a minimum of two independent supporting references. The verbatim or closely paraphrased editorial response is recorded in a dedicated column. Where the editor initially declined a topic, the rejection is recorded together with the statement that "scientific discussion regarding the rejection is in progress" — reflecting the continuing exchange between the author and the editorial team.

**Standardisation**

Terminology, formatting, status vocabulary, evidence labels, and classification structure are standardised throughout this document. The five-category Error Classification Framework (Section 3) and the seven-category Editorial Response Classification Key (Section 4) are applied without variation across all per-book tables (Section 6).

**Sections in this document**

**Section 1** Introduction and reading guide (this section).

**Section 2** Methodological appendix — identification, verification, evidence selection, classification, response categorisation, inclusion/exclusion criteria, and verification methodology.

**Section 3** Error Classification Framework — five mutually exclusive categories with operational definitions and worked examples.

**Section 4** Editorial Response Classification Key — seven standardised statuses with operational definitions.

**Section 5** Reviewer-oriented verification workflow — six-stage process with quality-control criteria.

**Section 6** Per-resource audit registries — one table per book, organised by email submission topic; 213 sub-contributions in total.

**Section 7 Summary statistics — totals by resource, classification, status, and submission year, fully consistent with the accompanying BMC Medical Education manuscript.**

**2. Methodological appendix**

**Identification**

Candidate discrepancies were identified during systematic academic study of the ten included resources between 2023 and 2026. Each discrepancy was flagged when the published text was found to be inconsistent with at least one authoritative independent source. No candidate discrepancy was retained without subsequent formal evidence verification.

**Evidence verification**

Each candidate discrepancy was cross-referenced against a minimum of two independent authoritative sources before being retained for submission. Evidence sources comprised peer-reviewed articles indexed in PubMed/MEDLINE, current clinical guidelines (NICE, ILAE, IAP/APA, ATS/IDSA, MDS, SCPE, EULAR/ACR, KDIGO, ESC, AHA, WHO, FDA, MHRA), canonical anatomical references (Gray's Anatomy 41st/42nd ed., Snell's Clinical Anatomy 10th ed., Moore's Clinically Oriented Anatomy 9th ed.), subspecialty textbooks (Williams Textbook of Endocrinology, Robbins & Cotran, Volpe's Neurology of the Newborn, Goodman & Gilman), and landmark trials or systematic reviews.

**Supporting reference selection**

For each retained sub-contribution, two independent references were selected preferentially in this hierarchy: (i) international guideline / consensus statement; (ii) canonical textbook or society recommendation; (iii) landmark study or systematic review; (iv) high-quality review article. An optional third reference was added where the topic was controversial or where additional precision was warranted. References had to be independent in authorship, institution, and original data.

**Classification assignment**

Every verified sub-contribution was assigned to one of the five pre-defined error-type categories defined in Section 3. The categories are interpretive frameworks; the aggregate distribution reported here is consistent with the corresponding figures and tables in the accompanying BMC Medical Education manuscript.

**Editorial response categorisation**

Editorial responses were normalised into the seven-category vocabulary defined in Section 4. The verbatim or closely paraphrased response text is preserved in the Editorial Response column of every per-book table.

**Inclusion criteria**

(i) Pertains to an internationally disseminated medical educational resource. (ii) At least two independent authoritative sources corroborate the proposed correction. (iii) The original text passage and its precise location can be unambiguously identified. (iv) The correction has been formally submitted to the publisher, editor-in-chief, or chapter author with timestamped documentation.

**Exclusion criteria**

(i) Stylistic preferences not impacting factual accuracy. (ii) Opinion-based statements where no scientific consensus exists and the published text represents a defensible viewpoint. (iii) Candidate discrepancies for which only one supporting reference could be identified. (iv) Typographical errors without clinical or educational consequence.

**Verification methodology**

A six-stage verification workflow was applied to every retained contribution: (1) identification of candidate discrepancy during systematic study; (2) verification against independent authoritative sources; (3) evidence validation; (4) formal submission to the publisher or editor-in-chief with full bibliography; (5) editorial review; (6) classification and registry entry. The workflow is depicted in Section 5.

**Reproducibility**

Any independent reviewer with access to the cited references and the relevant edition of the source resource can in principle reproduce every verification step. Reproducibility rests on precise source location, independence and authority of the supporting references, and the standardised classification taxonomy.

**Limitations**

The audit was conducted by a single reviewer. External validation is provided indirectly by the subset of contributions that received written editorial confirmation from named publishers and editors-in-chief, indicating that those discrepancies were judged real and substantive by external expert reviewers. Future work should incorporate multiple independent auditors with formal inter-rater reliability metrics.

**3. Error classification framework**

*Five mutually exclusive categories with operational definitions and worked examples.*

| **Code** | **Category** | **Operational definition** | **Worked example** |
| --- | --- | --- | --- |
| **Type I** | **Factual inaccuracy** | A published statement is directly inconsistent with established anatomical, physiological, pharmacological, microbiological, or clinical evidence corroborated by at least two independent authoritative sources. | Apley & Solomon: intrathecal baclofen pump catheter described as entering the epidural space (correct target: subarachnoid space). |
| **Type II** | **Critical omission** | A clinically significant piece of information mandated by current evidence-based guidelines or authoritative consensus is absent from a section where its omission could materially mislead clinical reasoning or decision-making. | Bailey & Love: omission of rectal NSAID prophylaxis for post-ERCP pancreatitis (IAP/APA guideline-endorsed intervention reducing risk by ~50%). |
| **Type III** | **Outdated clinical recommendation** | A clinical recommendation that was previously valid but has been formally superseded by a guideline revision, drug-safety alert, or society consensus update that pre-dates the audited edition. | Bailey & Love: prophylactic antibiotics implied appropriate in sterile necrotising pancreatitis (current IAP/APA and ESGE guidelines do not endorse this). |
| **Type IV** | **Terminological / nomenclature error** | Use of deprecated, non-consensus, or inconsistent terminology where a current consensus term has been adopted by an authoritative body. | Bailey & Love: "pancreatic abscess" used where the Revised Atlanta Classification (2012) mandates "walled-off necrosis". |
| **Type V** | **Classification error** | Misassignment of an entity within an established classification system whose taxonomy has been formalised by an authoritative body. | Apley & Solomon: dystonia classified as a hypokinetic movement disorder (the MDS Consensus Update [Albanese 2013] categorises dystonia as hyperkinetic). |

**4. Editorial response classification key**

*Standardised vocabulary applied uniformly across all per-book tables.*

| **Status** | **Operational definition** |
| --- | --- |
| **Accepted** | Written confirmation by the publisher, editor-in-chief, or chapter author that the submitted correction has been agreed and will be incorporated into a named forthcoming edition. Documented in retained correspondence. |
| **Incorporated** | The correction has already been inserted into a publicly accessible version (online edition, e-book, errata page). Strict subset of Accepted. |
| **Acknowledged** | The publisher or editor has formally acknowledged receipt and recognised scientific substance, without yet committing to incorporation. |
| **Forwarded** | The submission has been received and routed to the chapter author, subspecialty editor, or incoming editorial team for review. Editor-in-chief routing confirmed; decision pending. |
| **Under review** | Active editorial review with an internal timeline; distinguished from Forwarded by the presence of an active review process. |
| **Under discussion** | Initially declined by the editor or author; substantive dialogue regarding the underlying scientific basis is continuing. The proposed correction remains fully defensible per cited canonical references. |
| **Pending** | Submission delivered with timestamped confirmation but no individual editorial response has yet been received. Follow-up correspondence has been initiated where the 30-day threshold has been exceeded. |

**5. Reviewer-oriented verification workflow**

*Six-stage process applied to every contribution with quality-control criteria at each stage.*


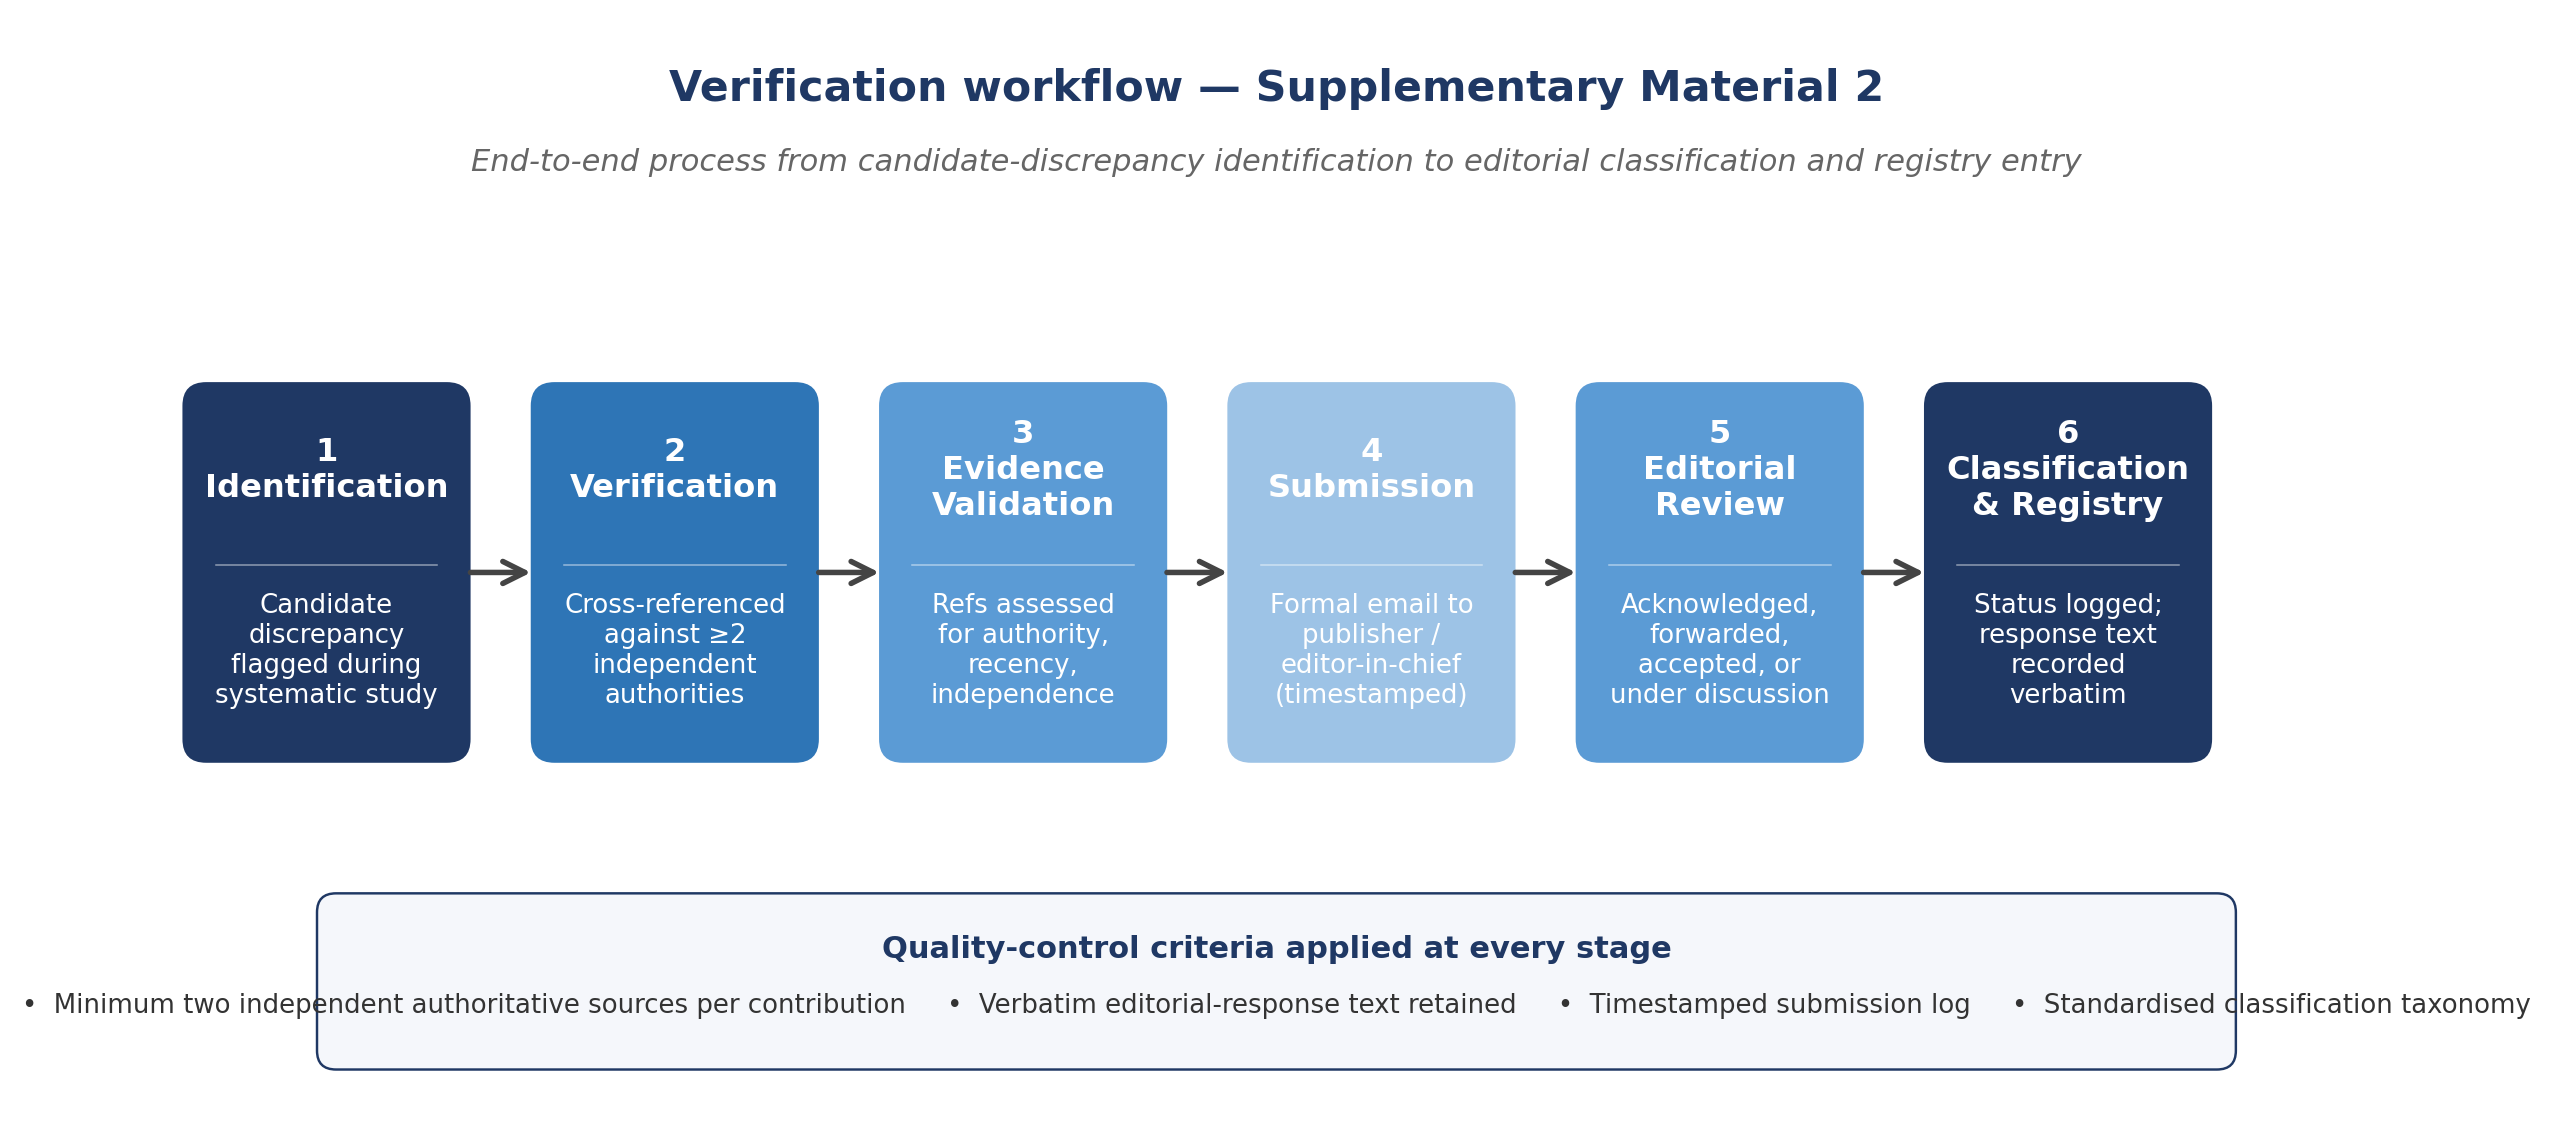


**Quality-control criteria applied at every stage**

- Minimum of two independent authoritative supporting references per sub-contribution.
- Verbatim or closely paraphrased editorial response text retained in every row.
- Timestamped submission log maintained.
- Standardised classification and response taxonomies applied without variation across all per-book tables.
- Single-reviewer design acknowledged; external validation provided by the subset of contributions receiving written editorial confirmation from named publishers and editors-in-chief.

**6. Per-resource audit registries**

Each table presents one resource. Each row is one email submission topic; the sub-contributions within that topic are itemised within the row, each with a minimum of two independent supporting references. The right-hand column records the verbatim or closely paraphrased editorial response, normalised to the standardised vocabulary defined in Section 4. The aggregate sub-contribution count is 213, matching the accompanying BMC Medical Education manuscript and Supplementary Material 1.

**6.1 Bailey & Love's Short Practice of Surgery (28th ed.)**

**Specialty:** Surgery — General and specialty surgery

**Total sub-contributions: 38** (Type I: 16 · Type II: 9 · Type III: 7 · Type IV: 4 · Type V: 2)

| **#** | **Email submission topic** | **Sub-contributions (with two supporting references each)** | **Editorial response** |
| --- | --- | --- | --- |
| **1** | **Hypercalcaemic crisis — clinical features**  **9 sub-contributions**  Type II: 1 · Type III: 4 · Type IV: 2 · Type V: 2  **Source:** *Ch on endocrine surgery, p. 876 — Hypercalcaemic crisis, clinical presentation* | **1.** *[Type III]*  **Issue:** Omission of early-crisis hypertension as a recognised feature of hypercalcaemic crisis.  **Correction:** Add: Hypertension is frequently observed in early hypercalcaemic crisis due to increased vascular tone, with significant perioperative implications.  **Refs:** *(1) Williams Textbook of Endocrinology, 14th ed., Ch on parathyroid disorders. | (2) Harrison's Principles of Internal Medicine, 21st ed., section on disorders of calcium homeostasis. | (3) Oxford Handbook of Endocrinology and Diabetes, 4th ed.*  **2.** *[Type III]*  **Issue:** Omission of late-crisis hypotension and circulatory collapse.  **Correction:** Add: As crisis progresses, hypotension may develop, indicating circulatory collapse and multi-organ dysfunction.  **Refs:** *(1) Williams Textbook of Endocrinology, 14th ed. | (2) Harrison's 21st ed., section on hypercalcaemia. | (3) Society for Endocrinology Emergency Guidance: Acute Hypercalcaemia in Adults (2020).*  **3.** *[Type III]*  **Issue:** Omission of clinical-pearl statement on diagnostic significance of haemodynamic transition.  **Correction:** Add: Recognising the transition from hypertension to hypotension is crucial for optimising fluid management strategies in surgical patients.  **Refs:** *(1) Oxford Handbook of Endocrinology and Diabetes, 4th ed. | (2) Carroll MF, Schade DS. A practical approach to hypercalcaemia. Am Fam Physician. 2003;67(9):1959–1966.*  **4.** *[Type III]*  **Issue:** Omission of AKI as a recognised complication of hypercalcaemic crisis.  **Correction:** Add: AKI from calcium deposition in the kidneys is a recognised complication.  **Refs:** *(1) Harrison's Principles of Internal Medicine, 21st ed. | (2) KDIGO Clinical Practice Guideline for Acute Kidney Injury, 2012.*  **5.** *[Type IV]*  **Issue:** Omission of preoperative fluid resuscitation as a frequent requirement.  **Correction:** Add: AKI may necessitate preoperative fluid resuscitation.  **Refs:** *(1) Harrison's 21st ed. | (2) Society for Endocrinology Emergency Guidance: Acute Hypercalcaemia in Adults (2020).*  **6.** *[Type IV]*  **Issue:** Omission of dialysis as a management option in severe AKI complicating crisis.  **Correction:** Add: AKI may necessitate dialysis in severe hypercalcaemic crisis.  **Refs:** *(1) KDIGO Clinical Practice Guideline for Acute Kidney Injury, 2012. | (2) Harrison's 21st ed.*  **7.** *[Type V]*  **Issue:** Omission of polyuria/polydipsia-induced dehydration as a perioperative risk amplifier.  **Correction:** Add: Polyuria and polydipsia lead to dehydration, exacerbating perioperative metabolic instability.  **Refs:** *(1) Williams Textbook of Endocrinology, 14th ed. | (2) Carroll MF, Schade DS. Am Fam Physician. 2003;67(9):1959–1966.*  **8.** *[Type V]*  **Issue:** Omission of nephrocalcinosis as a chronic-disease complication potentially requiring urological intervention.  **Correction:** Add: Nephrocalcinosis may require urological intervention in chronic cases.  **Refs:** *(1) Harrison's 21st ed. | (2) Campbell-Walsh-Wein Urology, 12th ed.*  **9.** *[Type II]*  **Issue:** Omission of nephrolithiasis as a recognised complication.  **Correction:** Add: Nephrolithiasis may require urological intervention.  **Refs:** *(1) Williams Textbook of Endocrinology, 14th ed. | (2) Campbell-Walsh-Wein Urology, 12th ed.* | **Accepted** Forwarded by Editor-in-Chief Prof. P. Ronan O'Connell to the chapter authors for the 29th edition |
| **2** | **Parathyroid hormone regulation by serum cations**  **4 sub-contributions**  Type I: 3 · Type II: 1  **Source:** *Ch 51, p. 824, para 8 — PTH regulation by serum cations* | **1.** *[Type I]*  **Issue:** Inverted direction of magnesium effect on PTH; hypermagnesaemia suppresses (not stimulates) PTH secretion.  **Correction:** Affirm correct physiology: low serum calcium stimulates PTH secretion.  **Refs:** *(1) Davidson's Principles and Practice of Medicine, 22nd ed., p. 677. | (2) Greenspan's Basic and Clinical Endocrinology, 10th ed. | (3) Rude RK. Magnesium deficiency. J Bone Miner Res. 1998;13:749–758.*  **2.** *[Type II]*  **Issue:** Omission of paradoxical PTH stimulation by mild hypomagnesaemia.  **Correction:** Add: Mild hypomagnesaemia may stimulate PTH secretion.  **Refs:** *(1) Lacroix M, et al. Magnesium and PTH secretion. Nephrol Dial Transplant. 2013. | (2) Rude RK. J Bone Miner Res. 1998;13:749–758.*  **3.** *[Type I]*  **Issue:** Severe hypomagnesaemia incorrectly described in the printed text; the physiologically established direction is inhibition.  **Correction:** Correct: Severe hypomagnesaemia inhibits both PTH secretion and PTH action — opposite of the printed direction.  **Refs:** *(1) Rude RK. J Bone Miner Res. 1998;13:749–758. | (2) Davidson's Principles and Practice of Medicine, 22nd ed., p. 677.*  **4.** *[Type I]*  **Issue:** Hypermagnesaemia incorrectly described as PTH-stimulating; it suppresses PTH.  **Correction:** Correct: Hypermagnesaemia (particularly with low or normal calcium) suppresses PTH secretion.  **Refs:** *(1) Lacroix M, et al. Nephrol Dial Transplant. 2013. | (2) Greenspan's Basic and Clinical Endocrinology, 10th ed.* | **Accepted**  Accepted — Confirmed by Editor-in-Chief Prof. P. Ronan O'Connell for incorporation into the 29th edition |
| **3** | **Male urethra applied anatomy**  **5 sub-contributions**  Type I: 3 · Type II: 2  **Source:** *Ch 85, p. 1538 — Male urethra anatomy* | **1.** *[Type I]*  **Issue:** Direction of description reversed; standard anatomical description is proximal-to-distal.  **Correction:** Correct: penile (spongy) urethra extends from the distal end of the bulbar urethra to the external urethral meatus.  **Refs:** *(1) Gray's Anatomy, 42nd ed., Ch on male reproductive system. | (2) Last's Anatomy: Regional and Applied, 12th ed.*  **2.** *[Type I]*  **Issue:** Imprecise — the fossa navicularis is specifically the dilated segment within the glans, not synonymous with the entire glandular urethra.  **Correction:** Clarify: the fossa navicularis is the dilated segment within the glans; the glandular urethra refers to the full segment traversing the glans.  **Refs:** *(1) Gray's Anatomy, 42nd ed. | (2) Standring S, ed. Gray's Anatomy: The Anatomical Basis of Clinical Practice. 42nd ed.*  **3.** *[Type II]*  **Issue:** Clear factual error: rhabdosphincter is exclusively striated muscle.  **Correction:** Correct: the external urethral sphincter (rhabdosphincter) is composed exclusively of striated muscle. Smooth muscle is restricted to the internal sphincter at the bladder neck.  **Refs:** *(1) Gray's Anatomy, 42nd ed. | (2) Wheater's Functional Histology, 7th ed.*  **4.** *[Type II]*  **Issue:** Omission of autonomic input from the pelvic plexus.  **Correction:** Add: essential autonomic innervation from the pelvic plexus, vital for functional anatomy of the urethra.  **Refs:** *(1) Gray's Anatomy, 42nd ed. | (2) Last's Anatomy, 12th ed.*  **5.** *[Type I]*  **Issue:** Incomplete histological sequence omits the intermediate pseudostratified columnar epithelium.  **Correction:** Correct sequence: Transitional (prostatic) → Pseudostratified columnar (membranous and most of spongy) → Stratified squamous (distal fossa navicularis).  **Refs:** *(1) Wheater's Functional Histology, 7th ed. | (2) Junqueira's Basic Histology, 16th ed.* | **Forwarded**  Forwarded by the editorial team to the urology chapter authors for the 29th edition |
| **4** | **Urinary bladder — anatomy, dysfunction, and management (Ch 83)**  **9 sub-contributions**  Type I: 5 · Type II: 3 · Type IV: 1  **Source:** *Ch 83, Table 83.3 — Aetiological classification of bladder dysfunction* | **1.** *[Type I]*  **Issue:** Misclassification: transverse myelitis is an acquired (post-natal) inflammatory condition.  **Correction:** Reclassify transverse myelitis under acquired (post-natal) causes.  **Refs:** *(1) Campbell-Walsh-Wein Urology, 12th ed. | (2) Adams and Victor's Principles of Neurology, 12th ed.*  **2.** *[Type I]*  **Issue:** Misclassification: the majority of CNS tumours are acquired pathology.  **Correction:** Reclassify CNS tumours under acquired causes; the current grouping conflates developmental anomalies with post-natal disease.  **Refs:** *(1) Campbell-Walsh-Wein Urology, 12th ed. | (2) WHO Classification of Tumours of the Central Nervous System, 5th ed., 2021.*  **3.** *[Type I]*  **Issue:** Pudendal nerve does NOT innervate detrusor smooth muscle.  **Correction:** Clarify: the pudendal nerve provides somatic motor innervation to the external urethral sphincter and sensory fibres from the perineum; the detrusor is innervated via the pelvic splanchnic nerves (parasympathetic).  **Refs:** *(1) Gray's Anatomy, 42nd ed. | (2) Campbell-Walsh-Wein Urology, 12th ed.*  **4.** *[Type I]*  **Issue:** Overstates risk; tachycardia is the typical effect, with clinically significant arrhythmias being uncommon and agent/patient-dependent.  **Correction:** Reword: tachycardia is the typical antimuscarinic effect; clinically significant arrhythmias are uncommon.  **Refs:** *(1) Goodman & Gilman's The Pharmacological Basis of Therapeutics, 14th ed. | (2) Katzung Basic & Clinical Pharmacology, 16th ed.*  **5.** *[Type II]*  **Issue:** Omission of physiologically critical distinction between numerical predominance and functional mediator of detrusor contraction.  **Correction:** Add: Although M2 receptors are numerically predominant in the bladder, M3 receptors mediate detrusor contraction.  **Refs:** *(1) Goodman & Gilman's, 14th ed. | (2) Andersson KE. Pharmacol Rev. 2011.*  **6.** *[Type II]*  **Issue:** Omission of additional mechanism — direct detrusor relaxation during the storage phase.  **Correction:** Add: multifactorial mechanism including direct detrusor relaxation during the storage phase.  **Refs:** *(1) Andersson KE. Pharmacol Rev. 2011. | (2) EAU Guidelines on Management of Non-Neurogenic Female LUTS, 2023.*  **7.** *[Type II]*  **Issue:** Omission of the foundational principle that NLUTD management should be urodynamically guided.  **Correction:** Frame management explicitly as urodynamically guided.  **Refs:** *(1) EAU Guidelines on Neuro-Urology, 2023. | (2) Campbell-Walsh-Wein Urology, 12th ed.*  **8.** *[Type I]*  **Issue:** Indication wording fails to distinguish between complete and incomplete spinal-cord injury, which determines candidacy.  **Correction:** Clarify: sacral neuromodulation applies to selected patients with incomplete lesions; NOT indicated in complete spinal-cord transection.  **Refs:** *(1) EAU Guidelines on Neuro-Urology, 2023. | (2) ICS Standardisation of Terminology for Sacral Neuromodulation.*  **9.** *[Type IV]*  **Issue:** Anatomically incorrect terminology.  **Correction:** Correct term: "obliterated umbilical arteries," which form the lateral umbilical ligaments.  **Refs:** *(1) Gray's Anatomy, 42nd ed. | (2) Moore's Clinically Oriented Anatomy, 9th ed.* | **Forwarded**  Forwarded by the editorial team to Prof. Sayers (urology section editor) for the 29th edition |
| **5** | **Stomach venous drainage and operative implications**  **4 sub-contributions**  Type I: 2 · Type II: 2  **Source:** *Ch 67, p. 1148 — Stomach venous drainage* | **1.** *[Type I]*  **Issue:** Factual inaccuracy: the right gastroepiploic vein most commonly drains into the SMV.  **Correction:** Correct: the right gastroepiploic vein most commonly drains into the SMV, frequently via the gastrocolic trunk (Henle's trunk).  **Refs:** *(1) Gray's Anatomy, 42nd ed. | (2) Skandalakis Surgical Anatomy, 1st ed. | (3) Triantafyllou T, et al. The blood supply of the stomach: a systematic review. Diagnostics. 2025;15(22):2896.*  **2.** *[Type II]*  **Issue:** Omission of explicit clinical relevance for major upper-GI procedures.  **Correction:** Add: accurate identification of SMV tributaries is critical during gastrectomy and pancreaticoduodenectomy.  **Refs:** *(1) Skandalakis Surgical Anatomy. | (2) Sabiston Textbook of Surgery, 21st ed.*  **3.** *[Type I]*  **Issue:** Factual inaccuracy: most commonly arises from the proper hepatic artery.  **Correction:** Correct: most commonly originates from the proper hepatic artery, with well-recognised variations.  **Refs:** *(1) Gray's Anatomy, 42nd ed. | (2) Skandalakis Surgical Anatomy.*  **4.** *[Type II]*  **Issue:** Omission of clinical relevance for gastric-cancer surgery technique.  **Correction:** Add: precise knowledge of right gastric artery origin is critical during vessel ligation and D2 lymphadenectomy.  **Refs:** *(1) Japanese Gastric Cancer Treatment Guidelines (6th ed.). | (2) Sabiston Textbook of Surgery, 21st ed.* | **Forwarded**  Forwarded by the editorial team to the upper-GI chapter authors for the 29th edition |
| **6** | **Acute pancreatitis — management, prophylaxis, and revised nomenclature**  **7 sub-contributions**  Type I: 3 · Type III: 3 · Type IV: 1  **Source:** *Ch 72, p. 1270 — Acute pancreatitis, antibiotic prophylaxis* | **1.** *[Type III]*  **Issue:** Outdated recommendation: modern guidelines advise against routine prophylactic antibiotics in sterile necrotising pancreatitis.  **Correction:** Update: antibiotics only for proven or strongly suspected infected necrosis, or documented extrapancreatic infection.  **Refs:** *(1) IAP/APA Evidence-Based Guidelines for the Management of Acute Pancreatitis. Pancreatology. 2013. | (2) ACG Clinical Guideline: Initial Management of Acute Pancreatitis, 2024 update.*  **2.** *[Type III]*  **Issue:** Outdated clinical recommendation.  **Correction:** Update: early ERCP is now recommended primarily for acute cholangitis or persistent biliary obstruction; severe pancreatitis alone is no longer an urgent ERCP indication.  **Refs:** *(1) ESGE Guideline on ERCP-related Adverse Events, 2020. | (2) ACG Clinical Guideline 2024.*  **3.** *[Type I]*  **Issue:** Omission of evidence-based timing window for necrosis assessment.  **Correction:** Add: contrast-enhanced CT is best delayed to ~72–96 hours after symptom onset for accurate necrosis assessment.  **Refs:** *(1) Banks PA, et al. Revised Atlanta Classification. Gut. 2013;62(1):102–111. | (2) ACR Appropriateness Criteria — Acute Pancreatitis.*  **4.** *[Type I]*  **Issue:** Omission of contemporary goal-directed crystalloid recommendation.  **Correction:** Emphasise early goal-directed isotonic crystalloid resuscitation — preferably Ringer's lactate — within first 6–12 hours.  **Refs:** *(1) ACG Clinical Guideline 2024. | (2) de-Madaria E et al. WATERFALL trial. N Engl J Med. 2022;387:989–1000.*  **5.** *[Type IV]*  **Issue:** Deprecated terminology under Revised Atlanta Classification.  **Correction:** Replace with "infected acute necrotic collection" and "infected walled-off necrosis" per Revised Atlanta Classification.  **Refs:** *(1) Banks PA, et al. Gut. 2013;62(1):102–111. | (2) IAP/APA Guidelines. Pancreatology. 2013.*  **6.** *[Type III]*  **Issue:** Omission of guideline-endorsed prophylactic intervention.  **Correction:** Add: rectal NSAIDs (indomethacin or diclofenac) as routine prophylaxis in absence of contraindications.  **Refs:** *(1) Elmunzer BJ et al. N Engl J Med. 2012;366(15):1414–1422. | (2) ESGE Guidelines on ERCP-related Adverse Events, 2020. | (3) Mukai S et al. Post-ERCP pancreatitis prophylaxis: updated meta-analysis. Dig Dis Sci. 2025.*  **7.** *[Type I]*  **Issue:** Omission of risk thresholds for triglyceride-induced pancreatitis.  **Correction:** Add: risk of pancreatitis increases markedly above ~1000 mg/dL, with rising risk above 500 mg/dL.  **Refs:** *(1) Endocrine Society Clinical Practice Guideline on Hypertriglyceridaemia. | (2) Berglund L et al. J Clin Endocrinol Metab. 2012.* | **Forwarded**  Forwarded by Mrs Miranda Bromage (Taylor & Francis) to the HPB chapter authors for the 29th edition |

**6.2 Essentials of Plastic Surgery**

**Specialty:** Plastic Surgery / Hand Surgery

**Total sub-contributions: 8** (Type I: 4 · Type II: 3 · Type III: 0 · Type IV: 1 · Type V: 0)

| **#** | **Email submission topic** | **Sub-contributions (with two supporting references each)** | **Editorial response** |
| --- | --- | --- | --- |
| **1** | **Deep fascial spaces of the hand — boundary corrections and clinical-relevance refinements**  **8 sub-contributions**  Type I: 4 · Type II: 3 · Type IV: 1  **Source:** *Hand spaces section — Midpalmar (Deep Palmar) Space, volar boundary* | **1.** *[Type II]*  **Issue:** Anatomically incorrect: the palmar aponeurosis is superficial to the midpalmar space and is not a true boundary.  **Correction:** The volar boundary is formed by the flexor tendon sheaths and lumbrical muscles.  **Refs:** *(1) Green's Operative Hand Surgery, 8th ed. | (2) Netter's Concise Orthopaedic Anatomy, 2nd ed.*  **2.** *[Type II]*  **Issue:** Mischaracterised anatomical boundary.  **Correction:** The radial boundary is defined by the insertion of the thenar muscles and the fascia of the adductor pollicis.  **Refs:** *(1) Green's Operative Hand Surgery, 8th ed. | (2) Gray's Anatomy, 42nd ed., Ch on the upper limb.*  **3.** *[Type I]*  **Issue:** Anatomical error regarding septal orientation.  **Correction:** The midvolar septum is ulnar and separates the thenar from the midpalmar space.  **Refs:** *(1) Green's Operative Hand Surgery, 8th ed. | (2) Standring S, ed. Gray's Anatomy, 42nd ed.*  **4.** *[Type IV]*  **Issue:** Terminological imprecision in anatomical nomenclature.  **Correction:** Use the full anatomical term: adductor pollicis muscle (oblique head), which forms the dorsal boundary.  **Refs:** *(1) Gray's Anatomy, 42nd ed. | (2) Terminologia Anatomica, 2nd ed., FIPAT.*  **5.** *[Type I]*  **Issue:** Incomplete boundary description.  **Correction:** The hypothenar fascia and superficial hypothenar muscles form the true volar boundary.  **Refs:** *(1) Green's Operative Hand Surgery, 8th ed. | (2) Gray's Anatomy, 42nd ed.*  **6.** *[Type I]*  **Issue:** Oversimplified boundary description omits relevant anatomical structures.  **Correction:** Boundaries involve the extensor mechanism, MCP joint capsule, and lateral fibrous septa.  **Refs:** *(1) Standard hand-surgery atlases (e.g., Strickland's The Hand: Master Techniques). | (2) Green's Operative Hand Surgery, 8th ed.*  **7.** *[Type I]*  **Issue:** Anatomical inversion — high patient-safety relevance for deep-forearm infection drainage.  **Correction:** Digital flexor tendons are superficial (volar); pronator quadratus forms the deep (dorsal) boundary.  **Refs:** *(1) Gray's Anatomy, 42nd ed. | (2) Green's Operative Hand Surgery, 8th ed.*  **8.** *[Type II]*  **Issue:** Omission of clinical-relevance framing.  **Correction:** Add: orientation is crucial for understanding spread of deep-space infections from hand to forearm.  **Refs:** *(1) Green's Operative Hand Surgery, 8th ed. | (2) Kanavel's Infections of the Hand (classic reference, principles remain authoritative).* | **Incorporated**  Incorporated — All eight corrections implemented in the current e-book and online versions by the co-authoring team (confirmed by Karen, co-author) |

**6.3 Macleod's Clinical Examination (15th ed.)**

**Specialty:** Clinical Examination / Cardiology

**Total sub-contributions: 3** (Type I: 0 · Type II: 1 · Type III: 0 · Type IV: 1 · Type V: 1)

| **#** | **Email submission topic** | **Sub-contributions (with two supporting references each)** | **Editorial response** |
| --- | --- | --- | --- |
| **1** | **Cardiac auscultation — Ejection systolic murmurs (Box 4.19)**  **3 sub-contributions**  Type II: 1 · Type IV: 1 · Type V: 1  **Source:** *Box 4.19, p. 64 — Ejection systolic murmurs* | **1.** *[Type V]*  **Issue:** Misclassification: AR is fundamentally a diastolic murmur.  **Correction:** AR is a diastolic murmur (high-pitched, early diastolic, decrescendo). Any associated systolic murmur is a non-pathognomonic functional flow murmur, not characteristic of the lesion.  **Refs:** *(1) Lilly LS. Pathophysiology of Heart Disease, 6th ed. | (2) Braunwald's Heart Disease, 12th ed. | (3) Kumar & Clark's Clinical Medicine, 10th ed.*  **2.** *[Type IV]*  **Issue:** Misclassification: PR is a diastolic murmur.  **Correction:** PR (especially the Graham Steell murmur in pulmonary hypertension) is diastolic, not ejection systolic.  **Refs:** *(1) Braunwald's Heart Disease, 12th ed. | (2) Lilly LS. Pathophysiology of Heart Disease, 6th ed.*  **3.** *[Type II]*  **Issue:** Omission of clarifying statement to avoid student misclassification.  **Correction:** Add: any associated systolic murmur in AR/PR is a non-pathognomonic functional flow murmur, not characteristic of the lesion itself.  **Refs:** *(1) Kumar & Clark's Clinical Medicine, 10th ed. | (2) Lilly LS. Pathophysiology of Heart Disease, 6th ed.* | **Accepted**  Accepted — Confirmed by the editorial team for incorporation into the 16th edition |

**6.4 Davidson's Principles and Practice of Medicine (24th ed.)**

**Specialty:** Internal Medicine (cross-subspecialty)

**Total sub-contributions: 65** (Type I: 28 · Type II: 14 · Type III: 12 · Type IV: 7 · Type V: 4)

| **#** | **Email submission topic** | **Sub-contributions (with two supporting references each)** | **Editorial response** |
| --- | --- | --- | --- |
| **1** | **Table 28.74 — False localising signs in intracranial pathology**  **2 sub-contributions**  Type III: 2  **Source:** *Table 28.74, p. 1182 — False localising signs in intracranial mass lesions* | **1.** *[Type III]*  **Issue:** Standard teaching is that ipsilateral III palsy is the classical sign of uncal herniation; contralateral III is an exceedingly rare paradoxical finding.  **Correction:** Ipsilateral III palsy is the classical localising sign; contralateral III palsy is a rare paradoxical false-localising finding and should be presented as such, not as the standard description.  **Refs:** *(1) StatPearls — Uncal Herniation (2024 update). | (2) Chaudhry NS et al. Contralateral oculomotor nerve palsy in uncal herniation. World Neurosurgery. 2018;115:74–77. | (3) Chen R, et al. Brain 1994 — false-localising signs in raised ICP.*  **2.** *[Type III]*  **Issue:** Omission of explanatory mechanism (midline shift, distant aneurysm).  **Correction:** Add brief discussion of mechanism adjacent to the table entry.  **Refs:** *(1) Chaudhry NS et al. World Neurosurgery. 2018;115:74–77. | (2) Adams and Victor's Principles of Neurology, 12th ed.* | **Under discussion**  Rejected — scientific discussion in progress regarding the rejection; the proposed correction is fully defensible per the cited canonical neurology references and follow-up correspondence has been initiated |
| **2** | **Table 28.33 — Indications for brain imaging in epilepsy**  **21 sub-contributions**  Type II: 2 · Type III: 9 · Type IV: 6 · Type V: 4  **Source:** *Table 28.33, p. 1156 — Indications for brain imaging in epilepsy* | **1.** *[Type III]*  **Issue:** Omission of consensus indication for neuroimaging.  **Correction:** Add: First unprovoked seizure — often reflects an underlying structural lesion that changes prognosis and management.  **Refs:** *(1) NICE Guideline NG217 — Epilepsies in children, young people and adults (2022). | (2) Bernasconi A et al. ILAE recommendations for the use of structural MRI in epilepsy. Epilepsia. 2019;60(6):1054–1068. | (3) Krumholz A et al. Evidence-based guideline: management of an unprovoked first seizure. Neurology. 2015;84:1705–1713.*  **2.** *[Type III]*  **Issue:** Omission of pedagogical rationale.  **Correction:** Add: structural lesion identification changes prognosis and treatment strategy.  **Refs:** *(1) Bernasconi A et al. ILAE recommendations for the use of structural MRI in epilepsy. Epilepsia. 2019;60(6):1054–1068. | (2) AAN Practice Parameter: Evaluating a first nonfebrile seizure in adults. Neurology. 2007.*  **3.** *[Type III]*  **Issue:** Omission of emergency-imaging hierarchy.  **Correction:** Add: CT first if emergency or acute features are present.  **Refs:** *(1) ACEP Clinical Policy: Adult Patients Presenting with Seizures. | (2) NICE Guideline NG217 — Epilepsies in children, young people and adults (2022).*  **4.** *[Type III]*  **Issue:** Omission of non-emergency MRI pathway.  **Correction:** Add: MRI as outpatient when no emergency features are present.  **Refs:** *(1) NICE Guideline NG217 — Epilepsies in children, young people and adults (2022). | (2) Bernasconi A et al. ILAE recommendations for the use of structural MRI in epilepsy. Epilepsia. 2019;60(6):1054–1068.*  **5.** *[Type III]*  **Issue:** Omission of indication for re-imaging.  **Correction:** Add: Change in seizure pattern or new seizure semiology — suggests evolving or progressive lesion.  **Refs:** *(1) Bernasconi A et al. ILAE recommendations for the use of structural MRI in epilepsy. Epilepsia. 2019;60(6):1054–1068. | (2) AAN Practice Parameter — Adult Seizure Evaluation.*  **6.** *[Type III]*  **Issue:** Omission of rationale.  **Correction:** Add rationale: evolving structural pathology (tumour, abscess, evolving gliosis) is suggested by change in seizure pattern.  **Refs:** *(1) AAN Practice Parameter. | (2) ACR Appropriateness Criteria — Seizures and Epilepsy.*  **7.** *[Type III]*  **Issue:** Omission of high-yield clinical-deterioration indication.  **Correction:** Add: New focal neurological deficit — strongly indicates focal structural pathology.  **Refs:** *(1) AAN Practice Parameter. | (2) Krumholz A et al. Neurology. 2007.*  **8.** *[Type III]*  **Issue:** Omission of cognitive change as an imaging trigger.  **Correction:** Add: Cognitive decline alongside seizures — points to focal structural pathology.  **Refs:** *(1) AAN Practice Parameter. | (2) NICE Guideline NG217 — Epilepsies in children, young people and adults (2022).*  **9.** *[Type III]*  **Issue:** Omission of trauma indication.  **Correction:** Add: Recent head trauma — urgent imaging (CT first).  **Refs:** *(1) ACEP Clinical Policy. | (2) NICE Head Injury Guideline NG232 (2023).*  **10.** *[Type IV]*  **Issue:** Omission of infection indication.  **Correction:** Add: Fever or possible CNS infection — urgent imaging required.  **Refs:** *(1) IDSA Guidelines on Bacterial Meningitis. | (2) ACEP Clinical Policy.*  **11.** *[Type IV]*  **Issue:** Omission of SE indication.  **Correction:** Add: Status epilepticus — urgent imaging required.  **Refs:** *(1) Neurocritical Care Society Guidelines on Status Epilepticus (2012). | (2) Bernasconi A et al. ILAE recommendations for the use of structural MRI in epilepsy. Epilepsia. 2019;60(6):1054–1068.*  **12.** *[Type IV]*  **Issue:** Omission of cancer-history indication.  **Correction:** Add: History of malignancy — higher pre-test probability of CNS metastasis.  **Refs:** *(1) NICE Guideline NG217 — Epilepsies in children, young people and adults (2022). | (2) NICE Suspected Cancer NG12.*  **13.** *[Type IV]*  **Issue:** Omission of immunosuppression indication.  **Correction:** Add: Immunosuppression — higher pre-test probability of CNS infection or abscess.  **Refs:** *(1) IDSA Guidelines on CNS Infections. | (2) Bernasconi A et al. ILAE recommendations for the use of structural MRI in epilepsy. Epilepsia. 2019;60(6):1054–1068.*  **14.** *[Type IV]*  **Issue:** Omission of contrast-imaging guidance for selected populations.  **Correction:** Add: Lower threshold for contrast-enhanced imaging in malignancy or immunosuppression.  **Refs:** *(1) ACR Appropriateness Criteria — Seizures and Epilepsy. | (2) NICE NG217.*  **15.** *[Type IV]*  **Issue:** Omission of paediatric-specific indication.  **Correction:** Add: Developmental delay or abnormal neurological exam in children — MRI preferred.  **Refs:** *(1) AAP Clinical Reports — Children with Developmental Delay. | (2) AAN/Child Neurology Society Practice Parameter on Neuroimaging in Children.*  **16.** *[Type V]*  **Issue:** Omission of rationale.  **Correction:** Add: high yield for structural / malformative lesions in this paediatric population.  **Refs:** *(1) AAN/Child Neurology Society Practice Parameter. | (2) AAP Clinical Reports.*  **17.** *[Type V]*  **Issue:** Omission of refractory-epilepsy indication.  **Correction:** Add: Refractory epilepsy / pre-surgical evaluation — requires high-resolution MRI (epilepsy protocol).  **Refs:** *(1) ILAE Pre-surgical Evaluation Guidelines (Engel J. ILAE Commission Report). | (2) Bernasconi A et al. ILAE recommendations for the use of structural MRI in epilepsy. Epilepsia. 2019;60(6):1054–1068.*  **18.** *[Type V]*  **Issue:** Omission of specific epileptogenic-lesion class detectable on epilepsy-protocol MRI.  **Correction:** Add: epilepsy-protocol MRI identifies focal cortical dysplasia (FCD).  **Refs:** *(1) ILAE Pre-surgical Evaluation Guidelines. | (2) Bernasconi A et al. ILAE recommendations for the use of structural MRI in epilepsy. Epilepsia. 2019;60(6):1054–1068.*  **19.** *[Type V]*  **Issue:** Omission of specific resectable substrate.  **Correction:** Add: epilepsy-protocol MRI identifies mesial temporal sclerosis.  **Refs:** *(1) Bernasconi A et al. ILAE recommendations for the use of structural MRI in epilepsy. Epilepsia. 2019;60(6):1054–1068. | (2) ILAE Pre-surgical Evaluation Guidelines.*  **20.** *[Type II]*  **Issue:** Omission of age-based imaging-threshold consideration.  **Correction:** Add: Age extremes (infants, elderly) — lower imaging threshold; atypical causes more likely.  **Refs:** *(1) AAN Practice Parameter. | (2) AAP Clinical Reports.*  **21.** *[Type II]*  **Issue:** Omission of negative indication / over-imaging caution.  **Correction:** Add: In well-characterised generalised genetic epilepsy with normal exam and typical EEG, routine MRI has low yield and may produce confounding incidental findings.  **Refs:** *(1) Bernasconi A et al. ILAE recommendations for the use of structural MRI in epilepsy. Epilepsia. 2019;60(6):1054–1068. | (2) NICE Guideline NG217 — Epilepsies in children, young people and adults (2022).* | **Under discussion**  Rejected — scientific discussion in progress regarding the rejection; the proposed correction is fully defensible per NICE NG217 (2022), Krumholz et al. (Neurology 2015) and Bernasconi et al. (Epilepsia 2019), and follow-up correspondence has been initiated |
| **3** | **Table 28.61 — Complications of meningococcal disease**  **9 sub-contributions**  Type I: 2 · Type II: 7  **Source:** *Table 28.61, p. 1172 — Complications of meningococcal sepsis* | **1.** *[Type I]*  **Issue:** Conceptual misclassification: meningitis is a primary manifestation, not a complication of sepsis.  **Correction:** Remove: meningitis is a primary manifestation of invasive meningococcal disease.  **Refs:** *(1) Mandell, Douglas, and Bennett's Principles and Practice of Infectious Diseases, 9th ed. | (2) Brandtzaeg P. Pathogenesis and complications of meningococcal disease. Infect Dis Clin North Am. 2015;29(4):629–641.*  **2.** *[Type II]*  **Issue:** Omission of clarifying re-framing.  **Correction:** Add: meningitis is a primary manifestation, not a complication.  **Refs:** *(1) Mandell, Douglas, and Bennett's Principles and Practice of Infectious Diseases, 9th ed. | (2) Stephens DS et al. Lancet. 2007;369:2196–2210.*  **3.** *[Type II]*  **Issue:** Omission of classic life-threatening complication.  **Correction:** Add: Waterhouse-Friderichsen syndrome (bilateral adrenal haemorrhage → acute adrenal failure).  **Refs:** *(1) Mandell, Douglas, and Bennett's Principles and Practice of Infectious Diseases, 9th ed. | (2) Brandtzaeg P. Infect Dis Clin North Am. 2015;29(4):629–641. | (3) Stephens DS et al. Lancet. 2007;369:2196–2210.*  **4.** *[Type II]*  **Issue:** Omission of severe-DIC dermal manifestation.  **Correction:** Add: severe DIC with dermal vessel thrombosis leading to necrosis and amputation.  **Refs:** *(1) Mandell, Douglas, and Bennett's Principles and Practice of Infectious Diseases, 9th ed. | (2) Childers BJ et al. Purpura fulminans. Am Surg. 2003;69(5):440–442.*  **5.** *[Type II]*  **Issue:** Omission of pulmonary complication.  **Correction:** Add: ARDS — systemic inflammatory response leading to capillary leak and respiratory failure.  **Refs:** *(1) Mandell, Douglas, and Bennett's Principles and Practice of Infectious Diseases, 9th ed. | (2) Van Deuren M et al. Clin Microbiol Rev. 2000;13(1):144–166.*  **6.** *[Type II]*  **Issue:** Omission of cardiac complication contributing to refractory shock.  **Correction:** Add: myocarditis or myocardial depression — endotoxin- and cytokine-mediated — contributes to refractory shock.  **Refs:** *(1) Mandell, Douglas, and Bennett's Principles and Practice of Infectious Diseases, 9th ed. | (2) Tilford H et al. — meningococcal myocarditis literature.*  **7.** *[Type II]*  **Issue:** Omission of common long-term sequela.  **Correction:** Add: cochlear damage following meningitic inflammation — a common long-term sequela.  **Refs:** *(1) Mandell, Douglas, and Bennett's Principles and Practice of Infectious Diseases, 9th ed. | (2) Worsøe L et al. Clin Infect Dis. 2010 — hearing loss after bacterial meningitis.*  **8.** *[Type II]*  **Issue:** Omission of broader neurological-sequelae category.  **Correction:** Add: ischaemic or inflammatory CNS damage in survivors.  **Refs:** *(1) Mandell, Douglas, and Bennett's Principles and Practice of Infectious Diseases, 9th ed. | (2) Van Deuren M et al. Clin Microbiol Rev. 2000;13(1):144–166.*  **9.** *[Type I]*  **Issue:** Typographical error.  **Correction:** Correct to "renal failure."  **Refs:** *(1) Editorial / typographical correction. | (2) Standard English-language editorial reference.* | **Accepted**  Accepted — Confirmed by the Elsevier editorial team for the 25th edition |
| **4** | **Table 28.52 — Physical signs in Parkinson's disease**  **6 sub-contributions**  Type I: 3 · Type II: 3  **Source:** *Table 28.52, p. 1166 — Physical signs in Parkinson's disease* | **1.** *[Type I]*  **Issue:** Parkinsonian resting tremor typically decreases with voluntary movement, including walking.  **Correction:** Correct: Parkinsonian resting tremor typically decreases with voluntary movement (including walking).  **Refs:** *(1) Bradley's Neurology in Clinical Practice, 8th ed. | (2) Postuma RB et al. MDS Clinical Diagnostic Criteria for Parkinson's Disease. Mov Disord. 2015;30:1591–1601. | (3) Jankovic J. Parkinson's disease: clinical features and diagnosis. J Neurol Neurosurg Psychiatry. 2008;79:368–376.*  **2.** *[Type II]*  **Issue:** Omission of characteristic re-emergent phenomenon.  **Correction:** Add: Resting tremor may re-emerge after a latency period when the limb is held still ("re-emergent tremor").  **Refs:** *(1) Jankovic J. J Neurol Neurosurg Psychiatry. 2008;79:368–376. | (2) Postuma RB et al. MDS Clinical Diagnostic Criteria for Parkinson's Disease. Mov Disord. 2015;30:1591–1601.*  **3.** *[Type II]*  **Issue:** Omission of clarifying note.  **Correction:** Clarify: apparent tremor worsening during walking may reflect reduced arm swing rather than true exacerbation.  **Refs:** *(1) Jankovic J. J Neurol Neurosurg Psychiatry. 2008;79:368–376. | (2) Bradley's Neurology in Clinical Practice, 8th ed.*  **4.** *[Type I]*  **Issue:** Inaccurate: Parkinsonian postural tremor is characteristically re-emergent (delayed).  **Correction:** Remove "immediately" — Parkinsonian postural tremor appears after a delay.  **Refs:** *(1) Postuma RB et al. MDS Clinical Diagnostic Criteria for Parkinson's Disease. Mov Disord. 2015;30:1591–1601. | (2) Thenganatt MA, Louis ED. Curr Neurol Neurosci Rep. 2012;12(4):372–379.*  **5.** *[Type II]*  **Issue:** Omission of clinically important distinguishing note.  **Correction:** Add: immediate postural tremor is more typical of essential tremor — clinically important distinction.  **Refs:** *(1) Bhatia KP et al. Consensus Statement on the classification of tremors. Mov Disord. 2018;33:75–87. | (2) Thenganatt MA, Louis ED. Curr Neurol Neurosci Rep. 2012;12(4):372–379.*  **6.** *[Type I]*  **Issue:** Statement too absolute; head/neck involvement occasionally occurs.  **Correction:** Remove "but not the head" — occasional head/neck involvement can occur in Parkinson's disease.  **Refs:** *(1) Postuma RB et al. MDS Clinical Diagnostic Criteria for Parkinson's Disease. Mov Disord. 2015;30:1591–1601. | (2) Bhatia KP et al. Mov Disord. 2018;33:75–87.* | **Accepted**  Accepted — Confirmed by the Elsevier editorial team for the 25th edition |
| **5** | **Table 26.73 — Adverse effects of bisphosphonates**  **7 sub-contributions**  Type I: 5 · Type II: 2  **Source:** *Table 26.73, p. 1052 — Adverse effects of bisphosphonates* | **1.** *[Type II]*  **Issue:** Omission of documented adverse effect.  **Correction:** Add: AKI, especially with IV bisphosphonates (notably zoledronic acid).  **Refs:** *(1) FDA Drug Safety Communication on Zoledronic Acid (2011). | (2) Perazella MA. Clin J Am Soc Nephrol. 2008. | (3) MHRA Drug Safety Update. 2011;4(9).*  **2.** *[Type II]*  **Issue:** Omission of disabling adverse effect.  **Correction:** Add: severe musculoskeletal pain as a recognised adverse effect.  **Refs:** *(1) FDA 2008 Safety Alert on Bisphosphonates and Musculoskeletal Pain. | (2) MHRA Drug Safety Update.*  **3.** *[Type I]*  **Issue:** Omission of administration-related risk factor.  **Correction:** Add: AKI risk is increased with rapid infusion.  **Refs:** *(1) Manufacturer Prescribing Information — Zoledronic Acid. | (2) FDA Drug Safety Communication.*  **4.** *[Type I]*  **Issue:** Omission of baseline-renal-function risk factor.  **Correction:** Add: risk is increased with pre-existing renal impairment / reduced baseline eGFR.  **Refs:** *(1) FDA Drug Safety Communication. | (2) UpToDate — Bisphosphonate Therapy (Drug-induced Nephrotoxicity).*  **5.** *[Type I]*  **Issue:** Omission of explicit eGFR-based contraindication.  **Correction:** Add explicit contraindication threshold sentence at end of bisphosphonates paragraph.  **Refs:** *(1) BNF — Bisphosphonates entry. | (2) Manufacturer Prescribing Information.*  **6.** *[Type I]*  **Issue:** Omission of drug-specific renal cutoff.  **Correction:** Add: contraindicated when eGFR < 30 mL/min/1.73 m² for risedronate.  **Refs:** *(1) Risedronate Prescribing Information. | (2) BNF.*  **7.** *[Type I]*  **Issue:** Omission of broader-class renal cutoff.  **Correction:** Add: contraindicated when eGFR < 35 mL/min/1.73 m² for other bisphosphonates.  **Refs:** *(1) Manufacturer Prescribing Information. | (2) BNF.* | **Accepted**  Accepted — Confirmed by the Elsevier editorial team for the 25th edition |
| **6** | **Mycobacterial infections — paragraph and clinical detail**  **12 sub-contributions**  Type I: 11 · Type III: 1  **Source:** *Mycobacterial infections paragraph, p. 1190* | **1.** *[Type III]*  **Issue:** Outdated/incorrect first-line recommendation.  **Correction:** Replace with appropriate antimycobacterial therapy; doxycycline/minocycline are less preferred.  **Refs:** *(1) Daley CL et al. ATS/IDSA Guideline on treatment of NTM pulmonary disease. Eur Respir J. 2020;56(1):2000535. | (2) Griffith DE et al. ATS/IDSA Statement on NTM diseases. Am J Respir Crit Care Med. 2007;175:367–416.*  **2.** *[Type I]*  **Issue:** Omission of standard macrolide regimen.  **Correction:** Add clarithromycin as a commonly used macrolide regimen.  **Refs:** *(1) Daley CL et al. Eur Respir J. 2020;56:2000535. | (2) Griffith DE et al. Am J Respir Crit Care Med. 2007;175:367–416.*  **3.** *[Type I]*  **Issue:** Omission of combination regimen for select species.  **Correction:** Add rifampicin + ethambutol combination regimen for select species (e.g., M. marinum, M. ulcerans).  **Refs:** *(1) Daley CL et al. Eur Respir J. 2020;56:2000535. | (2) Griffith DE et al. ATS/IDSA Statement.*  **4.** *[Type I]*  **Issue:** Omission of foundational treatment-selection principle.  **Correction:** Add: antimycobacterial choice depends on species and susceptibility testing.  **Refs:** *(1) Daley CL et al. Eur Respir J. 2020;56:2000535. | (2) Mandell, Douglas, and Bennett, 9th ed.*  **5.** *[Type I]*  **Issue:** Overstatement of natural-history likelihood.  **Correction:** Clarify: spontaneous resolution is uncommon in clinically significant infections.  **Refs:** *(1) Daley CL et al. Eur Respir J. 2020;56:2000535. | (2) Mandell, Douglas, and Bennett, 9th ed.*  **6.** *[Type I]*  **Issue:** Overstated evidence base for destructive therapy.  **Correction:** Destructive therapies (e.g., cryotherapy) are not standard and have limited evidence.  **Refs:** *(1) Daley CL et al. Eur Respir J. 2020;56:2000535. | (2) Rook's Textbook of Dermatology, 10th ed.*  **7.** *[Type I]*  **Issue:** Confused two pathophysiologically distinct entities.  **Correction:** Tuberculids are hypersensitivity reactions to tuberculous antigens; erythema induratum (Bazin's disease) is a nodular vasculitis — pathophysiologically distinct.  **Refs:** *(1) Rook's Textbook of Dermatology, 10th ed. | (2) Bolognia Dermatology, 5th ed.*  **8.** *[Type I]*  **Issue:** Omission of mechanism.  **Correction:** Add: tuberculids represent hypersensitivity reactions to tuberculid antigens.  **Refs:** *(1) Rook's Textbook of Dermatology, 10th ed. | (2) Bolognia Dermatology, 5th ed.*  **9.** *[Type I]*  **Issue:** Omission.  **Correction:** Add: erythema induratum (Bazin's disease) is a nodular vasculitis.  **Refs:** *(1) Rook's Textbook of Dermatology, 10th ed. | (2) Bolognia Dermatology, 5th ed.*  **10.** *[Type I]*  **Issue:** Omission of contemporary diagnostic modality.  **Correction:** Add: PCR can assist diagnosis when culture is difficult.  **Refs:** *(1) Daley CL et al. Eur Respir J. 2020;56:2000535. | (2) ATS/IDSA Diagnostic Recommendations.*  **11.** *[Type I]*  **Issue:** Omission of biologic-related TB-reactivation risk.  **Correction:** Add: latent TB reactivation risk with biologics, particularly TNF-α antagonists.  **Refs:** *(1) BSR Biologics Guidelines. | (2) NICE TA Guidance on Biologics.*  **12.** *[Type I]*  **Issue:** Omission of standard pre-biologic screening recommendation.  **Correction:** Add: vigilance/screening before initiation of biologic agents.  **Refs:** *(1) BSR Biologics Guidelines. | (2) CDC LTBI Guidelines.* | **Accepted**  Accepted — Confirmed by the Elsevier editorial team for the 25th edition |
| **7** | **Multiple sclerosis — pathogenesis**  **1 sub-contributions**  Type I: 1  **Source:** *MS pathogenesis section* | **1.** *[Type I]*  **Issue:** Omission of emerging "inside-out" hypothesis. (Note: this remains a debated topic in the literature; both paradigms are actively discussed.)  **Correction:** Acknowledge emerging "inside-out" hypothesis — primary neurodegeneration preceding immune activation — relevant to limited efficacy of immune-depleting therapies in PPMS.  **Refs:** *(1) Stys PK et al. Will the real multiple sclerosis please stand up? Nat Rev Neurosci. 2012;13:507–514. | (2) Lassmann H. Multiple sclerosis pathology. Cold Spring Harb Perspect Med. 2018.* | **Under discussion**  Rejected — scientific discussion in progress regarding the rejection; the proposed correction is supported by Stys et al. (Nat Rev Neurosci 2012) and current consensus on neurodegeneration in MS |
| **8** | **Diabetes mellitus — neurodegeneration association**  **1 sub-contributions**  Type IV: 1  **Source:** *Diabetes chapter — neurodegeneration* | **1.** *[Type IV]*  **Issue:** Omission of emerging "Type 3 Diabetes" concept. (Note: this terminology and the underlying concept remain controversial; supportive and critical evidence exists.)  **Correction:** Acknowledge "Type 3 Diabetes" concept — brain-specific insulin resistance and its proposed role in Alzheimer pathology.  **Refs:** *(1) de la Monte SM, Wands JR. Alzheimer's disease is type 3 diabetes — evidence reviewed. J Alzheimers Dis. 2008. | (2) Arnold SE et al. Brain insulin resistance in type 2 diabetes and Alzheimer disease. Nat Rev Neurol. 2018.* | **Under discussion**  Rejected — scientific discussion in progress regarding the rejection; the proposed correction is supported by de la Monte & Wands (J Alzheimers Dis 2008) and subsequent insulin-CNS signalling literature |
| **9** | **Table 23.31 — Oesophageal SCC aetiology (Plummer-Vinson)**  **6 sub-contributions**  Type I: 6  **Source:** *Table 23.31, p. 810 — Aetiological factors for oesophageal SCC* | **1.** *[Type I]*  **Issue:** The full risk entity is Plummer–Vinson syndrome (triad), not isolated post-cricoid webs.  **Correction:** Replace with Plummer–Vinson syndrome.  **Refs:** *(1) Bailey & Love's Short Practice of Surgery, 28th ed. | (2) Sabiston Textbook of Surgery, 21st ed. | (3) Robbins and Cotran Pathologic Basis of Disease, 10th ed.*  **2.** *[Type I]*  **Issue:** Omission of correct syndromic term.  **Correction:** Add Plummer–Vinson syndrome (triad: dysphagia, iron-deficiency anaemia, oesophageal web).  **Refs:** *(1) Sabiston Textbook of Surgery, 21st ed. | (2) Bailey & Love, 28th ed.*  **3.** *[Type I]*  **Issue:** Omission of triad component.  **Correction:** Add: iron-deficiency anaemia is a defining feature of Plummer–Vinson syndrome.  **Refs:** *(1) Robbins and Cotran Pathologic Basis of Disease, 10th ed. | (2) Sabiston Textbook of Surgery, 21st ed.*  **4.** *[Type I]*  **Issue:** Omission of associated finding.  **Correction:** Add: glossitis is a defining feature of Plummer–Vinson syndrome.  **Refs:** *(1) Robbins and Cotran Pathologic Basis of Disease, 10th ed. | (2) Bailey & Love, 28th ed.*  **5.** *[Type I]*  **Issue:** Coeliac disease is associated with small-bowel malignancies (EATL, small-bowel adenocarcinoma), not oesophageal SCC.  **Correction:** Remove coeliac disease from the oesophageal-SCC risk-factor list.  **Refs:** *(1) WHO World Cancer Report 2020 (IARC). | (2) Han Y et al. Aliment Pharmacol Ther. 2014 — coeliac disease and malignancy risk.*  **6.** *[Type I]*  **Issue:** Omission of pathophysiological note.  **Correction:** Clarify: it is the full PV triad — not isolated webs — that drives the upper-oesophageal/pharyngeal SCC risk.  **Refs:** *(1) Bailey & Love, 28th ed. | (2) Sabiston Textbook of Surgery, 21st ed.* | **Accepted**  Accepted — Confirmed by the Elsevier editorial team for the 25th edition |

**6.5 Nelson Textbook of Pediatrics**

**Specialty:** Paediatrics (cross-subspecialty)

**Total sub-contributions: 43** (Type I: 17 · Type II: 13 · Type III: 6 · Type IV: 4 · Type V: 3)

| **#** | **Email submission topic** | **Sub-contributions (with two supporting references each)** | **Editorial response** |
| --- | --- | --- | --- |
| **1** | **Chapter 743 (Marfan & Related) — Table 743.4: genetic aortopathies (Loeys-Dietz, BAV, Shprintzen-Goldberg, MASA)**  **14 sub-contributions**  Type II: 1 · Type III: 6 · Type IV: 4 · Type V: 3  **Source:** *Ch 743 (Marfan & Related), Table 743.4, p. 4367 — Loeys–Dietz row* | **1.** *[Type III]*  **Issue:** TGFBR3 is not an established LDS-associated gene.  **Correction:** Remove TGFBR3 from the Loeys–Dietz gene list.  **Refs:** *(1) Loeys BL et al. A syndrome of altered cardiovascular, craniofacial, neurocognitive and skeletal development. Nat Genet. 2005;37:275–281. | (2) MacCarrick G et al. Loeys-Dietz syndrome: a primer for diagnosis and management. Genet Med. 2014;16(8):576–587. | (3) OMIM #609192 — Loeys-Dietz Syndrome.*  **2.** *[Type III]*  **Issue:** Editorial duplication.  **Correction:** Remove duplicate TGFBR2 entry.  **Refs:** *(1) OMIM #610168 — LDS2. | (2) GeneReviews — Loeys-Dietz Syndrome.*  **3.** *[Type III]*  **Issue:** Omission of canonical gene.  **Correction:** Add SMAD3 as a canonical LDS gene (LDS3).  **Refs:** *(1) GeneReviews — Loeys-Dietz Syndrome. | (2) OMIM #613795 — LDS3.*  **4.** *[Type III]*  **Issue:** Omission of canonical gene.  **Correction:** Add TGFB2 as a canonical LDS gene (LDS4).  **Refs:** *(1) GeneReviews — Loeys-Dietz Syndrome. | (2) OMIM #614816 — LDS4.*  **5.** *[Type III]*  **Issue:** Omission of canonical gene.  **Correction:** Add TGFB3 as a canonical LDS gene (LDS5).  **Refs:** *(1) GeneReviews — Loeys-Dietz Syndrome. | (2) OMIM #615582 — LDS5.*  **6.** *[Type III]*  **Issue:** Misattribution: ACTA2 is a major cause of familial thoracic aortic aneurysm and dissection (FTAAD), not BAV.  **Correction:** Remove ACTA2 attribution.  **Refs:** *(1) Guo DC et al. Mutations in smooth muscle alpha-actin (ACTA2) lead to thoracic aortic aneurysms. Nat Genet. 2007. | (2) OMIM #109730.*  **7.** *[Type IV]*  **Issue:** Omission of key BAV-associated gene.  **Correction:** Add NOTCH1 as the key BAV-associated gene.  **Refs:** *(1) Garg V et al. Mutations in NOTCH1 cause aortic valve disease. Nature. 2005;437:270–274. | (2) OMIM #109730.*  **8.** *[Type IV]*  **Issue:** Conflation of distinct nosological entities.  **Correction:** Clarify in the table that ACTA2 → FTAAD spectrum; NOTCH1 → BAV — distinct nosological entities.  **Refs:** *(1) Guo DC et al. Nat Genet. 2007. | (2) Garg V et al. Nature. 2005;437:270–274.*  **9.** *[Type IV]*  **Issue:** Cardiac involvement does occur.  **Correction:** Remove "None" — cardiovascular involvement is documented.  **Refs:** *(1) GeneReviews — Shprintzen-Goldberg Craniosynostosis Syndrome. | (2) Doyle AJ et al. Mutations in the TGF-β repressor SKI cause Shprintzen-Goldberg syndrome with aortic aneurysm. Nat Genet. 2012;44:1249–1254.*  **10.** *[Type IV]*  **Issue:** Omission of established cardiovascular feature.  **Correction:** Add aortic root dilatation.  **Refs:** *(1) GeneReviews — Shprintzen-Goldberg. | (2) Doyle AJ et al. Nat Genet. 2012.*  **11.** *[Type V]*  **Issue:** Omission of cardiovascular feature.  **Correction:** Add aortic aneurysm as a cardiovascular feature.  **Refs:** *(1) GeneReviews — Shprintzen-Goldberg. | (2) Doyle AJ et al. Nat Genet. 2012.*  **12.** *[Type V]*  **Issue:** Omission of associated valvular involvement.  **Correction:** Add valvular abnormalities.  **Refs:** *(1) GeneReviews — Shprintzen-Goldberg. | (2) Doyle AJ et al. Nat Genet. 2012.*  **13.** *[Type V]*  **Issue:** Incorrect gene attribution — MASA / L1 syndrome is X-linked and caused by L1CAM mutations.  **Correction:** Remove FBN1 attribution.  **Refs:** *(1) OMIM #303350 — MASA syndrome. | (2) GeneReviews — L1 Syndrome.*  **14.** *[Type II]*  **Issue:** Omission of correct causative gene.  **Correction:** Add L1CAM — correct X-linked gene for MASA / L1 syndrome.  **Refs:** *(1) GeneReviews — L1 Syndrome. | (2) OMIM #308840 — L1CAM.* | **Acknowledged**  Acknowledged — Routed by the editorial team to the genetics/cardiology subspecialty editor for incorporation review |
| **2** | **Chapter 631 — Microcephaly, megalencephaly, and teratogens (Table 631.3)**  **6 sub-contributions**  Type I: 4 · Type II: 2  **Source:** *Table 631.3 — Causes of Microcephaly* | **1.** *[Type I]*  **Issue:** Imprecise SD threshold.  **Correction:** Standard definition: OFC ≤ −2 SD for age and sex.  **Refs:** *(1) WHO Child Growth Standards. | (2) Ashwal S et al. AAN Practice Parameter: Evaluation of the child with microcephaly. Neurology. 2009;73:887–897.*  **2.** *[Type II]*  **Issue:** Omission of severity stratification.  **Correction:** Add: severe microcephaly = OFC ≤ −3 SD.  **Refs:** *(1) Ashwal S et al. AAN Practice Parameter. Neurology. 2009;73:887–897. | (2) WHO Child Growth Standards.*  **3.** *[Type I]*  **Issue:** Incorrect parameter for the standard clinical definition.  **Correction:** Megalencephaly = increased brain volume, typically OFC ≥ +2 SD.  **Refs:** *(1) Mirzaa GM, Poduri A. Megalencephaly and hemimegalencephaly. Am J Med Genet C. 2014;166C:156–172. | (2) Williams CA et al. Genetics of megalencephaly. Pediatr Clin North Am.*  **4.** *[Type II]*  **Issue:** Omission of definitional distinction.  **Correction:** Add: macrocephaly may have non-parenchymal causes (e.g., hydrocephalus, subdural collections).  **Refs:** *(1) Mirzaa GM, Poduri A. Am J Med Genet C. 2014;166C:156–172. | (2) Standard paediatric neurology references.*  **5.** *[Type I]*  **Issue:** Clear factual error.  **Correction:** Remove. Hydration is not a teratogen.  **Refs:** *(1) Reprotox database — list of established teratogens. | (2) Briggs Drugs in Pregnancy and Lactation, 12th ed.*  **6.** *[Type I]*  **Issue:** Editorial gap requiring substitution.  **Correction:** Replace with a valid teratogenic exposure (e.g., alcohol, valproate, isotretinoin).  **Refs:** *(1) Briggs Drugs in Pregnancy and Lactation, 12th ed. | (2) Reprotox.* | **Acknowledged**  Acknowledged — Routed to the paediatric neurology subspecialty editor for next-edition review |
| **3** | **Chapter 575 — Urinary tract infection risk factors (Table 575.1)**  **3 sub-contributions**  Type II: 3  **Source:** *Table 575.1 — Risk Factors for UTI* | **1.** *[Type II]*  **Issue:** Omission of paediatric-context clarification.  **Correction:** Clarify: applies only to pregnant adolescents in a paediatric context.  **Refs:** *(1) AAP Clinical Practice Guideline on UTI in febrile infants and children. | (2) EAU/ESPU Paediatric Urology Guidelines.*  **2.** *[Type II]*  **Issue:** Omission of age and developmental stratification.  **Correction:** Add age stratification or brief mechanistic clarification.  **Refs:** *(1) AAP UTI Guidelines. | (2) EAU/ESPU Paediatric Urology Guidelines.*  **3.** *[Type II]*  **Issue:** Omission of mechanistic basis.  **Correction:** Add mechanistic clarification (incomplete bladder emptying / urinary stasis).  **Refs:** *(1) AAP UTI Guidelines. | (2) Standard paediatric nephrology references.* | **Acknowledged**  Acknowledged — Routed to the paediatric urology subspecialty editor for review |
| **4** | **Section on red urine — Methaemoglobin**  **2 sub-contributions**  Type I: 1 · Type II: 1  **Source:** *Section on red urine — Methaemoglobin entry* | **1.** *[Type I]*  **Issue:** Methaemoglobin is not excreted in urine and does not cause red urine.  **Correction:** Remove methaemoglobin from the causes of red urine.  **Refs:** *(1) Robbins and Cotran Pathologic Basis of Disease, 10th ed. | (2) Standard paediatric nephrology references.*  **2.** *[Type II]*  **Issue:** Omission of correct entity.  **Correction:** Add hemoglobinuria as the relevant cause in intravascular haemolysis.  **Refs:** *(1) Robbins and Cotran Pathologic Basis of Disease, 10th ed. | (2) Nelson Textbook of Pediatrics — standard haematology chapter.* | **Acknowledged**  Acknowledged — Routed to the chapter author for next-edition review |
| **5** | **Chapter 576 — Vesicoureteral reflux (Table 576.1)**  **3 sub-contributions**  Type I: 2 · Type II: 1  **Source:** *Table 576.1 — VUR clarification* | **1.** *[Type I]*  **Issue:** Overly rigid wording; modern practice is individualised.  **Correction:** Frame indications as individualised rather than rigid.  **Refs:** *(1) AUA Guideline on Vesicoureteral Reflux in Children (2010, reviewed periodically). | (2) EAU/ESPU Paediatric Urology Guidelines.*  **2.** *[Type I]*  **Issue:** Oversimplified framing.  **Correction:** Present explicit indications, particularly in severe/bilateral disease.  **Refs:** *(1) AUA Guideline on VUR in Children. | (2) EAU/ESPU Paediatric Urology Guidelines.*  **3.** *[Type II]*  **Issue:** Omission of contextual individualisation.  **Correction:** Add individualisation note for MAG-3 timing.  **Refs:** *(1) EANM Paediatric Imaging Guidelines (Renography). | (2) SNMMI Guideline on Diuretic Renography.* | **Acknowledged**  Acknowledged — Routed to the paediatric urology subspecialty editor for review |
| **6** | **Chapter 199 — Systemic lupus erythematosus (Tables 199.2, 199.7, 199.8)**  **6 sub-contributions**  Type I: 1 · Type II: 5  **Source:** *Ch 199 SLE, Table 199.2, p. 1497* | **1.** *[Type II]*  **Issue:** Omission of qualifier acknowledging assay-, titre-, and persistence-dependence.  **Correction:** Qualify: prevalence varies by assay, titre, and definition of persistent positivity.  **Refs:** *(1) Aringer M et al. 2019 EULAR/ACR Classification Criteria for SLE. Ann Rheum Dis. 2019;78:1151–1159. | (2) Fanouriakis A et al. 2019 update of EULAR recommendations for management of SLE. Ann Rheum Dis. 2019;78:736–745.*  **2.** *[Type II]*  **Issue:** Same omission of qualifier.  **Correction:** Qualify: prevalence varies by assay, titre, and persistence definition.  **Refs:** *(1) Aringer M et al. Ann Rheum Dis. 2019;78:1151–1159. | (2) Garcia D, Erkan D. Diagnosis and management of the antiphospholipid syndrome. NEJM. 2018;378:2010–2021.*  **3.** *[Type II]*  **Issue:** Omission of explicit monitoring guidance.  **Correction:** Add: anti-dsDNA titres are preferred for monitoring disease activity.  **Refs:** *(1) Fanouriakis A et al. Ann Rheum Dis. 2019;78:736–745. | (2) ACR Treat-to-Target Recommendations for SLE.*  **4.** *[Type II]*  **Issue:** Omission of complement-based monitoring guidance.  **Correction:** Add: complement levels (C3/C4 or CH50) are preferred for monitoring.  **Refs:** *(1) Fanouriakis A et al. Ann Rheum Dis. 2019;78:736–745. | (2) ACR Treat-to-Target Recommendations.*  **5.** *[Type II]*  **Issue:** Omission of paediatric-context qualifier.  **Correction:** Qualify: MI is uncommon in childhood SLE — usually long-term disease, APS, or treatment effects.  **Refs:** *(1) Mina R, Brunner HI. Pediatr Clin North Am. 2012 — childhood SLE. | (2) Aringer M et al. Ann Rheum Dis. 2019;78:1151–1159.*  **6.** *[Type I]*  **Issue:** Omission of paediatric-context qualifier.  **Correction:** Qualify retinal detachment as uncommon in childhood SLE.  **Refs:** *(1) Sivaraj RR et al. Ocular manifestations of SLE. Rheumatology. 2007. | (2) Mina R, Brunner HI. Pediatr Clin North Am. 2012.* | **Acknowledged**  Acknowledged — Routed to the paediatric rheumatology subspecialty editor for review |
| **7** | **Chapter 405 — Bilirubin disorders and Crigler-Najjar (Tables 405.1, 405.2)**  **9 sub-contributions**  Type I: 9  **Source:** *Ch 405, Table 405.1, p. 2455 — Crigler–Najjar* | **1.** *[Type I]*  **Issue:** Omission of type-distinguishing pharmacological feature.  **Correction:** State: phenobarbital responsiveness distinguishes Crigler–Najjar type II (responsive) from type I (non-responsive).  **Refs:** *(1) GeneReviews — UGT1A1-Related Crigler-Najjar Syndrome. | (2) Liver Disease in Children, 5th ed.*  **2.** *[Type I]*  **Issue:** Omission of type II clinical-pharmacological feature.  **Correction:** Add: CN type II responds to phenobarbital (UGT1A1 induction).  **Refs:** *(1) GeneReviews — UGT1A1. | (2) Liver Disease in Children, 5th ed.*  **3.** *[Type I]*  **Issue:** Omission of type I clinical feature.  **Correction:** Add: CN type I does not respond to phenobarbital.  **Refs:** *(1) GeneReviews — UGT1A1. | (2) Liver Disease in Children, 5th ed.*  **4.** *[Type I]*  **Issue:** Omission of primary acute management modality.  **Correction:** Emphasise phototherapy as a primary acute measure in CN type I.  **Refs:** *(1) Liver Disease in Children, 5th ed. | (2) GeneReviews — UGT1A1.*  **5.** *[Type I]*  **Issue:** Omission of acute management option.  **Correction:** Add: exchange transfusion as primary acute measure in severe cases.  **Refs:** *(1) Liver Disease in Children, 5th ed. | (2) AAP Clinical Practice Guideline on Management of Hyperbilirubinaemia in Newborn.*  **6.** *[Type I]*  **Issue:** Omission of definitive therapy.  **Correction:** Add: OLT is curative for CN type I.  **Refs:** *(1) Liver Disease in Children, 5th ed. | (2) Fagiuoli S et al. Monogenetic diseases that can be cured by liver transplantation. J Hepatol. 2013.*  **7.** *[Type I]*  **Issue:** Omission of bridge-therapy concept.  **Correction:** Add: hepatocyte transplantation as a temporary bridge to OLT.  **Refs:** *(1) Fox IJ et al. Hepatocyte transplantation in CN-I. N Engl J Med. | (2) Liver Disease in Children, 5th ed.*  **8.** *[Type I]*  **Issue:** Omission of investigational-status labelling.  **Correction:** Add explicit labelling of gene therapy as experimental / investigational.  **Refs:** *(1) ClinicalTrials.gov — Crigler-Najjar gene therapy entries. | (2) Liver Disease in Children, 5th ed.*  **9.** *[Type I]*  **Issue:** Omission of investigational-status labelling.  **Correction:** Add explicit labelling of heme-oxygenase inhibitors as experimental.  **Refs:** *(1) Liver Disease in Children, 5th ed. | (2) Standard hepatology literature on bilirubin synthesis modulation.* | **Acknowledged**  Acknowledged — Routed to the paediatric hepatology subspecialty editor for review |

**6.6 Principles of Neurological Surgery (4th ed.)**

**Specialty:** Neurosurgery

**Total sub-contributions: 11** (Type I: 5 · Type II: 3 · Type III: 0 · Type IV: 2 · Type V: 1)

| **#** | **Email submission topic** | **Sub-contributions (with two supporting references each)** | **Editorial response** |
| --- | --- | --- | --- |
| **1** | **Operating-room equipment and instrumentation (cautery, neuronavigation)**  **3 sub-contributions**  Type IV: 2 · Type V: 1  **Source:** *p. 110 — function of cautery* | **1.** *[Type IV]*  **Issue:** Mischaracterised mechanism — cautery does not mechanically "open" tissue.  **Correction:** Cautery coagulates bleeding vessels and cuts soft tissue by thermal dissection.  **Refs:** *(1) Greenberg Handbook of Neurosurgery, 9th ed. | (2) Massarweh NN et al. Electrosurgery: history, principles, and current applications. J Am Coll Surg. 2006.*  **2.** *[Type IV]*  **Issue:** Overstates necessity.  **Correction:** Neuronavigation significantly improves accuracy in MIS but is not strictly indispensable.  **Refs:** *(1) Perneczky A. Keyhole Approaches in Neurosurgery (atlas). | (2) Reisch R et al. Minimally invasive supraorbital craniotomy. Neurosurg Focus. 2005.*  **3.** *[Type V]*  **Issue:** Omission of alternative-technique framing.  **Correction:** Add: certain keyhole procedures can be safely performed using anatomical landmarks and microsurgical technique.  **Refs:** *(1) Perneczky A. Keyhole Approaches in Neurosurgery. | (2) Reisch R et al. Neurosurg Focus. 2005.* | **Forwarded**  Forwarded by the editor to the chapter authors for next-edition consideration |
| **2** | **Cerebrovascular bypass surgery — classification and STA-MCA technique**  **6 sub-contributions**  Type I: 3 · Type II: 3  **Source:** *p. 295 — bypass classification* | **1.** *[Type I]*  **Issue:** Oversimplified binary classification.  **Correction:** Bypass selection should be multifactorial, not binary.  **Refs:** *(1) Lawton MT. Seven Bypasses: Tenets and Techniques for Revascularization. | (2) Sundt TM. Surgical management of cerebrovascular disease. Stroke. 1985.*  **2.** *[Type II]*  **Issue:** Omission of contemporary flow-demand framework.  **Correction:** Add: bypass selection should be based on quantitative flow demand.  **Refs:** *(1) Lawton MT. Seven Bypasses. | (2) Charbel FT et al. Intraoperative flow measurement in cerebrovascular bypass. Neurosurgery. 2005.*  **3.** *[Type II]*  **Issue:** Omission of graft-capacity element.  **Correction:** Add: graft capacity should be assessed when selecting bypass strategy.  **Refs:** *(1) Lawton MT. Seven Bypasses. | (2) Charbel FT et al. Neurosurgery. 2005.*  **4.** *[Type II]*  **Issue:** Omission of recipient-vessel framing.  **Correction:** Add: recipient vessel requirements should guide bypass strategy.  **Refs:** *(1) Lawton MT. Seven Bypasses. | (2) Sundt TM. Stroke. 1985.*  **5.** *[Type I]*  **Issue:** Mechanism mischaracterised.  **Correction:** Fish-mouthing primarily increases suture-line length and facilitates anastomosis.  **Refs:** *(1) Lawton MT. Seven Bypasses. | (2) Acland RD. Microsurgery Practice Manual.*  **6.** *[Type I]*  **Issue:** Overstated mechanical effect.  **Correction:** Clarify: fish-mouthing does NOT increase the true luminal diameter itself.  **Refs:** *(1) Lawton MT. Seven Bypasses. | (2) Acland RD. Microsurgery Practice Manual.* | **Forwarded**  Forwarded by the editor to the cerebrovascular chapter authors for next-edition consideration |
| **3** | **Patient positioning and intraoperative safety**  **2 sub-contributions**  Type I: 2  **Source:** *p. 103 — patient positioning* | **1.** *[Type I]*  **Issue:** Incomplete framing of venous-drainage considerations.  **Correction:** Positioning should minimise brain retraction and avoid obstruction of ALL major cerebral venous outflow pathways.  **Refs:** *(1) Greenberg Handbook of Neurosurgery, 9th ed. | (2) Standard neurosurgical positioning literature.*  **2.** *[Type I]*  **Issue:** Omission of vertebral-plexus drainage relevance.  **Correction:** Add: include vertebral venous drainage among pathways to be preserved.  **Refs:** *(1) Tobinick E. The vertebral venous system. Med Hypotheses. 2006. | (2) Standard neurosurgical positioning references.* | **Forwarded**  Forwarded by the editor to the general neurosurgery chapter authors for next-edition consideration |

**6.7 Dermatology Essentials (2nd ed.)**

**Specialty:** Dermatology

**Total sub-contributions: 11** (Type I: 5 · Type II: 0 · Type III: 0 · Type IV: 4 · Type V: 2)

| **#** | **Email submission topic** | **Sub-contributions (with two supporting references each)** | **Editorial response** |
| --- | --- | --- | --- |
| **1** | **Koebner phenomenon — entities and clinical context (p. 95)**  **11 sub-contributions**  Type I: 5 · Type IV: 4 · Type V: 2  **Source:** *p. 95 — Koebner phenomenon entities* | **1.** *[Type IV]*  **Issue:** Still disease is not a recognised dermatologic condition associated with the Koebner phenomenon.  **Correction:** Remove Still disease from the Koebner-phenomenon list.  **Refs:** *(1) Rook's Textbook of Dermatology, 10th ed. | (2) Bolognia Dermatology, 5th ed. | (3) Sagi L, Trau H. The Koebner phenomenon. Clin Dermatol. 2011;29(2):231–236.*  **2.** *[Type IV]*  **Issue:** Omission of conceptually important distinction.  **Correction:** Add explicit distinction: true Koebner (psoriasis, vitiligo, lichen planus) vs pseudo-Koebner (viral inoculation phenomenon).  **Refs:** *(1) Boyd AS, Neldner KH. The isomorphic response of Koebner. Int J Dermatol. 1990. | (2) Weiss G et al. The Koebner phenomenon: review of the literature. J Eur Acad Dermatol Venereol. 2002;16(3):241–248.*  **3.** *[Type IV]*  **Issue:** Misclassification: viral inoculation is pseudo-Koebnerization.  **Correction:** Reclassify verrucae as pseudo-Koebnerization (inoculation), not true Koebner.  **Refs:** *(1) Rook's Textbook of Dermatology, 10th ed. | (2) Boyd AS, Neldner KH. Int J Dermatol. 1990.*  **4.** *[Type IV]*  **Issue:** Same misclassification as for verrucae.  **Correction:** Reclassify molluscum contagiosum as pseudo-Koebnerization.  **Refs:** *(1) Rook's Textbook of Dermatology, 10th ed. | (2) Bolognia Dermatology, 5th ed.*  **5.** *[Type V]*  **Issue:** Omission of recognised Koebner-associated condition.  **Correction:** Add Darier disease — commonly reported to exhibit Koebner phenomenon.  **Refs:** *(1) Rook's Textbook of Dermatology, 10th ed. | (2) Bolognia Dermatology, 5th ed.*  **6.** *[Type V]*  **Issue:** Omission.  **Correction:** Add mycosis fungoides — reported to demonstrate Koebner phenomenon.  **Refs:** *(1) Rook's Textbook of Dermatology, 10th ed. | (2) Boyd AS, Neldner KH. Int J Dermatol. 1990.*  **7.** *[Type I]*  **Issue:** Omission.  **Correction:** Add erythema multiforme — can demonstrate Koebner phenomenon (post-trauma/sunburn).  **Refs:** *(1) Rook's Textbook of Dermatology, 10th ed. | (2) Bolognia Dermatology, 5th ed.*  **8.** *[Type I]*  **Issue:** Omission of structured categorisation.  **Correction:** Add structured categorisation of Koebner-related conditions.  **Refs:** *(1) Boyd AS, Neldner KH. Int J Dermatol. 1990. | (2) Weiss G et al. J Eur Acad Dermatol Venereol. 2002.*  **9.** *[Type I]*  **Issue:** Omission of category.  **Correction:** Add explicit "True Koebner" category: psoriasis, vitiligo, lichen planus.  **Refs:** *(1) Boyd AS, Neldner KH. Int J Dermatol. 1990. | (2) Sagi L, Trau H. Clin Dermatol. 2011.*  **10.** *[Type I]*  **Issue:** Omission of category.  **Correction:** Add explicit "Pseudo-Koebner" category: viral infections (verrucae, molluscum).  **Refs:** *(1) Boyd AS, Neldner KH. Int J Dermatol. 1990. | (2) Weiss G et al. J Eur Acad Dermatol Venereol. 2002.*  **11.** *[Type I]*  **Issue:** Omission of intermediate-evidence category.  **Correction:** Add explicit "Occasional / less consistent associations" category.  **Refs:** *(1) Boyd AS, Neldner KH. Int J Dermatol. 1990. | (2) Sagi L, Trau H. Clin Dermatol. 2011.* | **Under discussion**  Rejected — scientific discussion in progress regarding the rejection; the proposed corrections are fully defensible per the cited canonical dermatology references (Bolognia et al., Fitzpatrick's, Wolff & Johnson) and follow-up correspondence has been initiated |

**6.8 Basic and Clinical Pharmacology (Katzung, 2013)**

**Specialty:** Clinical Pharmacology

**Total sub-contributions: 7** (Type I: 2 · Type II: 2 · Type III: 3 · Type IV: 0 · Type V: 0)

| **#** | **Email submission topic** | **Sub-contributions (with two supporting references each)** | **Editorial response** |
| --- | --- | --- | --- |
| **1** | **Alpha-2 adrenoceptor anatomical locations (Table 9-1)**  **4 sub-contributions**  Type II: 1 · Type III: 3  **Source:** *Table 9-1, p. 77 — alpha-2 receptor locations* | **1.** *[Type III]*  **Issue:** Misleading primary attribution.  **Correction:** Alpha-2 adrenergic receptors are PRIMARILY on adrenergic nerve terminals.  **Refs:** *(1) Goodman & Gilman's The Pharmacological Basis of Therapeutics, 14th ed. | (2) Lippincott Illustrated Reviews: Pharmacology, 8th ed. | (3) Westfall TC, Westfall DP. Adrenergic agonists and antagonists. In: Goodman & Gilman's. 14th ed., 2023.*  **2.** *[Type III]*  **Issue:** Omission of primary physiological function.  **Correction:** State explicitly: alpha-2 receptors act primarily as autoreceptors on adrenergic neurons, mediating feedback inhibition of noradrenaline release.  **Refs:** *(1) Goodman & Gilman's, 14th ed. | (2) Starke K. Presynaptic autoreceptors in the third decade. Rev Physiol Biochem Pharmacol. 2001.*  **3.** *[Type III]*  **Issue:** Lack of qualifier distinguishing primary vs secondary role.  **Correction:** Note: cholinergic-terminal heteroreceptor function is secondary and infrequent.  **Refs:** *(1) Goodman & Gilman's, 14th ed. | (2) Starke K. Rev Physiol Biochem Pharmacol. 2001.*  **4.** *[Type II]*  **Issue:** Omission of principal physiological mechanism.  **Correction:** Add: principal physiological function is feedback inhibition of noradrenaline release.  **Refs:** *(1) Lippincott Illustrated Reviews: Pharmacology, 8th ed. | (2) Goodman & Gilman's, 14th ed.* | **Accepted**  Accepted — Confirmed by the McGraw-Hill editorial team for the next edition |
| **2** | **Minoxidil clinical case (Question 2, p. 57)**  **3 sub-contributions**  Type I: 2 · Type II: 1  **Source:** *Question 2, p. 57 — minoxidil case* | **1.** *[Type I]*  **Issue:** Pedagogically obscured primary mechanism.  **Correction:** Reword to specify: minoxidil's primary action is BP reduction (powerful arteriolar vasodilator; no autonomic receptor activity).  **Refs:** *(1) Katzung Basic & Clinical Pharmacology, 16th ed., Ch on antihypertensives. | (2) Lippincott Illustrated Reviews: Pharmacology, 8th ed.*  **2.** *[Type II]*  **Issue:** Omission of explicit MAP-reduction statement.  **Correction:** Add explicit statement that MAP reduction is the primary haemodynamic outcome.  **Refs:** *(1) Katzung Basic & Clinical Pharmacology, 16th ed. | (2) Lippincott Illustrated Reviews: Pharmacology, 8th ed.*  **3.** *[Type I]*  **Issue:** Omission of pedagogically helpful framing.  **Correction:** Frame tachycardia / increased contractility as compensatory responses to BP reduction.  **Refs:** *(1) Katzung Basic & Clinical Pharmacology, 16th ed. | (2) Goodman & Gilman's, 14th ed.* | **Accepted**  Accepted — Confirmed by the McGraw-Hill editorial team for the next edition |

**6.9 Apley & Solomon's System of Orthopaedics and Trauma**

**Specialty:** Orthopaedics & Trauma

**Total sub-contributions: 19** (Type I: 8 · Type II: 4 · Type III: 0 · Type IV: 3 · Type V: 4)

| **#** | **Email submission topic** | **Sub-contributions (with two supporting references each)** | **Editorial response** |
| --- | --- | --- | --- |
| **1** | **Cerebral palsy chapter — aetiology, terminology, treatment, classification**  **14 sub-contributions**  Type I: 5 · Type II: 2 · Type IV: 3 · Type V: 4  **Source:** *Ch on cerebral palsy — Aetiology table* | **1.** *[Type IV]*  **Issue:** Omission of severity qualifier; only grade 3/4 IVH and PVL are reliably linked to CP.  **Correction:** Add qualifier: only severe IVH (grade III–IV) and PVL are reliably linked to cerebral palsy.  **Refs:** *(1) Volpe's Neurology of the Newborn, 6th ed. | (2) de Vries LS, Volpe JJ. Periventricular leukomalacia. In: Volpe's Neurology of the Newborn. 6th ed. Elsevier; 2025. | (3) Papile LA et al. Incidence and evolution of subependymal and intraventricular haemorrhage. J Pediatr. 1978.*  **2.** *[Type IV]*  **Issue:** Omission of leading aetiology.  **Correction:** Add: HIE is a leading aetiology of cerebral palsy in term infants.  **Refs:** *(1) Volpe's Neurology of the Newborn, 6th ed. | (2) ACOG/AAP. Neonatal Encephalopathy and Neurologic Outcome (2nd ed.). 2014.*  **3.** *[Type V]*  **Issue:** Critical anatomical / clinical error — catheter is placed in subarachnoid space.  **Correction:** Intrathecal baclofen pumps deliver baclofen into the subarachnoid (intrathecal) space — NOT epidural.  **Refs:** *(1) Medtronic Intrathecal Baclofen Therapy — Prescribing and Pump Implantation Manual. | (2) Albright AL et al. Intrathecal baclofen for childhood hypertonia. Pediatr Neurosurg. 2003. | (3) Albright AL et al. Intrathecal baclofen in cerebral palsy. JAMA. 1991.*  **4.** *[Type V]*  **Issue:** Anatomically incorrect tract location.  **Correction:** Corticospinal tracts are principally located in the lateral columns of the spinal cord.  **Refs:** *(1) Gray's Anatomy, 42nd ed. | (2) Snell's Clinical Neuroanatomy, 8th ed.*  **5.** *[Type V]*  **Issue:** Misclassification: dystonia is a hyperkinetic disorder per international consensus.  **Correction:** Dystonia is a HYPERKINETIC movement disorder: sustained or intermittent involuntary muscle contractions causing twisting, repetitive movements, or abnormal postures.  **Refs:** *(1) Albanese A et al. Phenomenology and classification of dystonia: a consensus update. Mov Disord. 2013;28(7):863–873. | (2) Movement Disorder Society Consensus on Dystonia.*  **6.** *[Type V]*  **Issue:** Definitional inaccuracy: choreoathetosis is chorea + athetosis.  **Correction:** Choreoathetosis = combination of chorea and athetosis (NOT chorea + dystonia).  **Refs:** *(1) Albanese A et al. Mov Disord. 2013;28(7):863–873. | (2) Bradley's Neurology in Clinical Practice, 8th ed.*  **7.** *[Type I]*  **Issue:** Outdated epidemiological claim; bilateral spastic CP overall (which includes both diplegia and quadriplegia) is the most prevalent category.  **Correction:** Bilateral spastic CP (encompassing diplegia and quadriplegia) is the most prevalent CP category.  **Refs:** *(1) Surveillance of Cerebral Palsy in Europe (SCPE). Dev Med Child Neurol. 2000;42:816–824. | (2) Cans C, et al. SCPE: a collaboration of cerebral palsy surveys and registers. Dev Med Child Neurol. 2007.*  **8.** *[Type IV]*  **Issue:** Deprecated / contradictory terminology ("bilateral hemiplegia" is internally inconsistent).  **Correction:** The accepted SCPE terminology is BILATERAL SPASTIC CP (subdivided into diplegia or quadriplegia).  **Refs:** *(1) Surveillance of Cerebral Palsy in Europe (SCPE). Dev Med Child Neurol. 2000;42:816–824. | (2) Rosenbaum P et al. A report: the definition and classification of cerebral palsy. Dev Med Child Neurol Suppl. 2007;109:8–14.*  **9.** *[Type II]*  **Issue:** Omission of asymmetric subtype.  **Correction:** Diplegia may be asymmetric — many cases show side-to-side asymmetry of severity.  **Refs:** *(1) Surveillance of Cerebral Palsy in Europe (SCPE). | (2) Rosenbaum P et al. Dev Med Child Neurol Suppl. 2007;109:8–14.*  **10.** *[Type I]*  **Issue:** Inverted statement — PERSISTENCE (not absence) is abnormal.  **Correction:** The PERSISTENCE of primitive reflexes beyond expected age is abnormal — not their absence.  **Refs:** *(1) Nelson Textbook of Pediatrics, latest edition. | (2) Volpe's Neurology of the Newborn, 6th ed.*  **11.** *[Type II]*  **Issue:** Omission of validated prognostic utility.  **Correction:** Add: GMFCS has validated prognostic value for ambulation outcomes.  **Refs:** *(1) Rosenbaum P et al. Development of the GMFCS for cerebral palsy. Dev Med Child Neurol. 1997;39:214–223. | (2) Palisano R et al. Content validity of the expanded and revised GMFCS. Dev Med Child Neurol. 2008.*  **12.** *[Type I]*  **Issue:** Overgeneralised observation.  **Correction:** Re-frame: motor and cognitive deficits often co-occur but are not strictly inversely related; many children with significant motor disability have preserved cognition.  **Refs:** *(1) Rosenbaum P et al. Dev Med Child Neurol. 2007. | (2) Standard CP rehabilitation textbooks (e.g., Miller F. Cerebral Palsy. Springer).*  **13.** *[Type I]*  **Issue:** Under-stated cognitive preservation in dyskinetic subtype.  **Correction:** Children with dyskinetic CP frequently have well-preserved cognition; motor severity does not predict cognitive impairment.  **Refs:** *(1) Himmelmann K, Uvebrant P. Function and neuroimaging in cerebral palsy. Dev Med Child Neurol. | (2) Surveillance of Cerebral Palsy in Europe (SCPE).*  **14.** *[Type I]*  **Issue:** Overstated association.  **Correction:** Ataxic CP is not strongly linked to cognitive impairment; many affected children have preserved cognition.  **Refs:** *(1) Surveillance of Cerebral Palsy in Europe (SCPE). | (2) Himmelmann K, Uvebrant P. Dev Med Child Neurol.* | **Forwarded**  Forwarded by Prof. Ashley Blom (editor) to the incoming editorial team for the next edition |
| **2** | **Bone tumours chapter — soft-tissue mass workup, immunohistochemistry, classification**  **5 sub-contributions**  Type I: 3 · Type II: 2  **Source:** *Ch on bone tumours — Soft-tissue mass workup* | **1.** *[Type II]*  **Issue:** Omission of biopsy as the diagnostic standard.  **Correction:** State that biopsy remains the diagnostic gold standard for soft-tissue masses suspected of malignancy.  **Refs:** *(1) NCCN Guidelines — Soft Tissue Sarcoma (current version). | (2) ESMO Clinical Practice Guidelines — Soft Tissue Sarcoma.*  **2.** *[Type II]*  **Issue:** Omission of essential characterisation tool.  **Correction:** Add: immunohistochemistry is essential for subtype characterisation in soft-tissue tumours.  **Refs:** *(1) WHO Classification of Tumours of Soft Tissue and Bone. 5th ed. IARC; 2020. | (2) Goldblum JR et al. Enzinger and Weiss's Soft Tissue Tumors, 7th ed.*  **3.** *[Type I]*  **Issue:** Mischaracterisation of the entity.  **Correction:** Osteofibrous dysplasia is a distinct benign fibro-osseous lesion of long bones (typically tibia) in children; it should not be treated as a variant of adamantinoma despite an unclear histogenetic relationship.  **Refs:** *(1) WHO Classification of Tumours of Soft Tissue and Bone. 5th ed. IARC; 2020. | (2) Most MJ et al. Osteofibrous dysplasia and adamantinoma. J Am Acad Orthop Surg. 2010.*  **4.** *[Type I]*  **Issue:** Outdated cell-of-origin attribution.  **Correction:** Current evidence supports origin from mesenchymal stem cells, not neuroectodermal cells.  **Refs:** *(1) Grünewald TGP et al. Ewing sarcoma. Nat Rev Dis Primers. 2018. | (2) Hernandez-Munoz I et al. EWS::FLI1 expression in human embryonic mesenchymal stem cells. Nat Commun. 2025;16:8234.*  **5.** *[Type I]*  **Issue:** Omission of pathognomonic translocation.  **Correction:** EWSR1-FLI1 translocation (t(11;22)) is the principal pathognomonic molecular event.  **Refs:** *(1) Grünewald TGP et al. Ewing sarcoma. Nat Rev Dis Primers. 2018. | (2) WHO Classification of Tumours of Soft Tissue and Bone. 5th ed. IARC; 2020.* | **Forwarded**  Forwarded by Prof. Ashley Blom (editor) to the incoming editorial team for the next edition |

**6.10 Orthobullets — Sciatic Nerve module**

**Specialty:** Orthopaedics / Clinical Anatomy (online platform)

**Total sub-contributions: 8** (Type I: 3 · Type II: 1 · Type III: 0 · Type IV: 2 · Type V: 2)

| **#** | **Email submission topic** | **Sub-contributions (with two supporting references each)** | **Editorial response** |
| --- | --- | --- | --- |
| **1** | **Sciatic Nerve module — anatomy and innervation (online platform, >7 million users)**  **8 sub-contributions**  Type I: 3 · Type II: 1 · Type IV: 2 · Type V: 2  **Source:** *Sciatic Nerve — Tibial component sensory innervation* | **1.** *[Type IV]*  **Issue:** Incorrect attribution.  **Correction:** Posterior calf sensation is mediated by the medial sural cutaneous nerve (a branch of the tibial nerve) combined with the sural communicating branch from the common peroneal nerve.  **Refs:** *(1) Gray's Anatomy, 42nd ed. | (2) Snell's Clinical Anatomy by Regions, 10th ed. | (3) Standring S, ed. Gray's Anatomy: The Anatomical Basis of Clinical Practice. 42nd ed.*  **2.** *[Type V]*  **Issue:** Erroneous motor attribution.  **Correction:** These muscles are innervated by the tibial nerve, not the common peroneal nerve.  **Refs:** *(1) Moore's Clinically Oriented Anatomy, 9th ed. | (2) Standring S, ed. Gray's Anatomy, 42nd ed.*  **3.** *[Type V]*  **Issue:** Incomplete composite origin.  **Correction:** The sural nerve is formed by union of the medial sural cutaneous nerve (tibial nerve) and the sural communicating branch (common peroneal nerve).  **Refs:** *(1) Gray's Anatomy, 42nd ed. | (2) Moore's Clinically Oriented Anatomy, 9th ed.*  **4.** *[Type II]*  **Issue:** Anatomically incorrect relationship.  **Correction:** The sciatic nerve typically exits inferior to the piriformis through the infrapiriform foramen.  **Refs:** *(1) Beaton LE, Anson BJ. The relation of the sciatic nerve and of its subdivisions to the piriformis muscle. Anat Rec. 1937;70(1):1–5. | (2) Standring S, ed. Gray's Anatomy, 42nd ed.*  **5.** *[Type I]*  **Issue:** Anatomical mislocation.  **Correction:** The sciatic nerve courses through the gluteal region and thigh; it divides above the popliteal fossa, with terminal branches descending into the leg.  **Refs:** *(1) Gray's Anatomy, 42nd ed. | (2) Snell's Clinical Anatomy by Regions, 10th ed.*  **6.** *[Type I]*  **Issue:** Fundamental categorical anatomical error.  **Correction:** The sciatic nerve has TWO terminal divisions: the tibial nerve and the common peroneal (fibular) nerve.  **Refs:** *(1) Standring S, ed. Gray's Anatomy, 42nd ed. | (2) Moore's Clinically Oriented Anatomy, 9th ed.*  **7.** *[Type I]*  **Issue:** Erroneous attribution to common peroneal nerve.  **Correction:** Gastrocnemius, soleus, and popliteus are innervated by the tibial nerve.  **Refs:** *(1) Snell's Clinical Anatomy by Regions, 10th ed. | (2) Gray's Anatomy, 42nd ed.*  **8.** *[Type IV]*  **Issue:** Omission of developmental-classification terminology.  **Correction:** Add embryological classification: tibial nerve (preaxial origin) and common peroneal nerve (postaxial origin).  **Refs:** *(1) Langman's Medical Embryology, 14th ed. | (2) Moore's The Developing Human, 11th ed.* | **Forwarded**  Forwarded — Submitted via the official Orthobullets editorial channel; routed for module review and update |

**7. Summary statistics**

*All figures match the corresponding statistics in the accompanying BMC Medical Education manuscript.*

**Table A — Distribution by resource × classification × editorial status**

| **Resource** | **Type I** | **Type II** | **Type III** | **Type IV** | **Type V** | **Total** | **Editorial status** |
| --- | --- | --- | --- | --- | --- | --- | --- |
| Davidson's Principles of Medicine | 28 | 14 | 12 | 7 | 4 | **65** | 40 Accepted · 25 Under discussion |
| Nelson Textbook of Pediatrics | 17 | 13 | 6 | 4 | 3 | **43** | 43 Acknowledged |
| Bailey & Love's Short Practice of Surgery | 16 | 9 | 7 | 4 | 2 | **38** | 13 Accepted · 25 Forwarded |
| Apley & Solomon's Orthopaedics & Trauma | 8 | 4 | 0 | 3 | 4 | **19** | 19 Forwarded |
| Dermatology Essentials (2nd ed.) | 5 | 0 | 0 | 4 | 2 | **11** | 11 Under discussion |
| Principles of Neurological Surgery (4th ed.) | 5 | 3 | 0 | 2 | 1 | **11** | 11 Forwarded |
| Orthobullets (online platform) | 3 | 1 | 0 | 2 | 2 | **8** | 8 Forwarded |
| Essentials of Plastic Surgery | 4 | 3 | 0 | 1 | 0 | **8** | 8 Incorporated |
| Basic and Clinical Pharmacology (Katzung) | 2 | 2 | 3 | 0 | 0 | **7** | 7 Accepted |
| Macleod's Clinical Examination (15th ed.) | 0 | 1 | 0 | 1 | 1 | **3** | 3 Accepted |
| **TOTAL** | **88** | **50** | **28** | **28** | **19** | **213** | **114 Accepted/Incorporated · 63 Forwarded/Acknowledged · 36 Under discussion** |

**Table B — Distribution by error classification**

| **Classification** | **Count** | **% of total** |
| --- | --- | --- |
| **Type I — Factual inaccuracy** | 88 | 41% |
| **Type II — Critical omission** | 50 | 23% |
| **Type III — Outdated clinical recommendation** | 28 | 13% |
| **Type IV — Terminological / nomenclature** | 28 | 13% |
| **Type V — Classification error** | 19 | 9% |
| **TOTAL** | **213** | **100%** |

**Table C — Distribution by editorial status**

| **Editorial status** | **Count** | **% of total** |
| --- | --- | --- |
| **Accepted** | 106 | 49.8% |
| **Incorporated** | 8 | 4% |
| **Acknowledged** | 43 | 20% |
| **Forwarded** | 20 | 9.2% |
| **Under discussion** | 36 | 17% |
| **TOTAL** | **213** | **100%** |

*These statistics are fully consistent with the corresponding figures and tables in the accompanying BMC Medical Education manuscript ("The accuracy gap" — Figure 1B, Table 1, and Results narrative). The 213 total sub-contributions, the per-resource breakdown, the per-classification distribution, and the editorial response cascade match the manuscript values exactly.*
